# Supplementary material for: Expanding the chiral pool: oxidation of meta-bromobenzoic acid by R. eutrophus B9 allows access to new reaction manifolds
Source: Royal Society of Chemistry journal article supplement (doi:10.1039/c1ob05131h), 2011-01-01
Supplement: c1ob05131h.pdf [file c1ob05131h.pdf]

## Electronic Supporting Information

Expanding the chiral pool: oxidation of 3-bromobenzoic acid by  
*R. eutrophus* B9 allows access to new reaction manifolds.

Julia A. Griffen, Amélie M. Le Coz, Gabriele Kociok-Köhn, Monika Ali Khan, Alan J. W.  
Stewart and Simon E. Lewis\*

|                                       |         |
|---------------------------------------|---------|
| NMR Spectra . . . . .                 | Page 2  |
| X-Ray crystallographic data . . . . . | Page 24 |

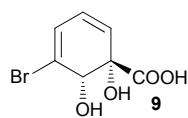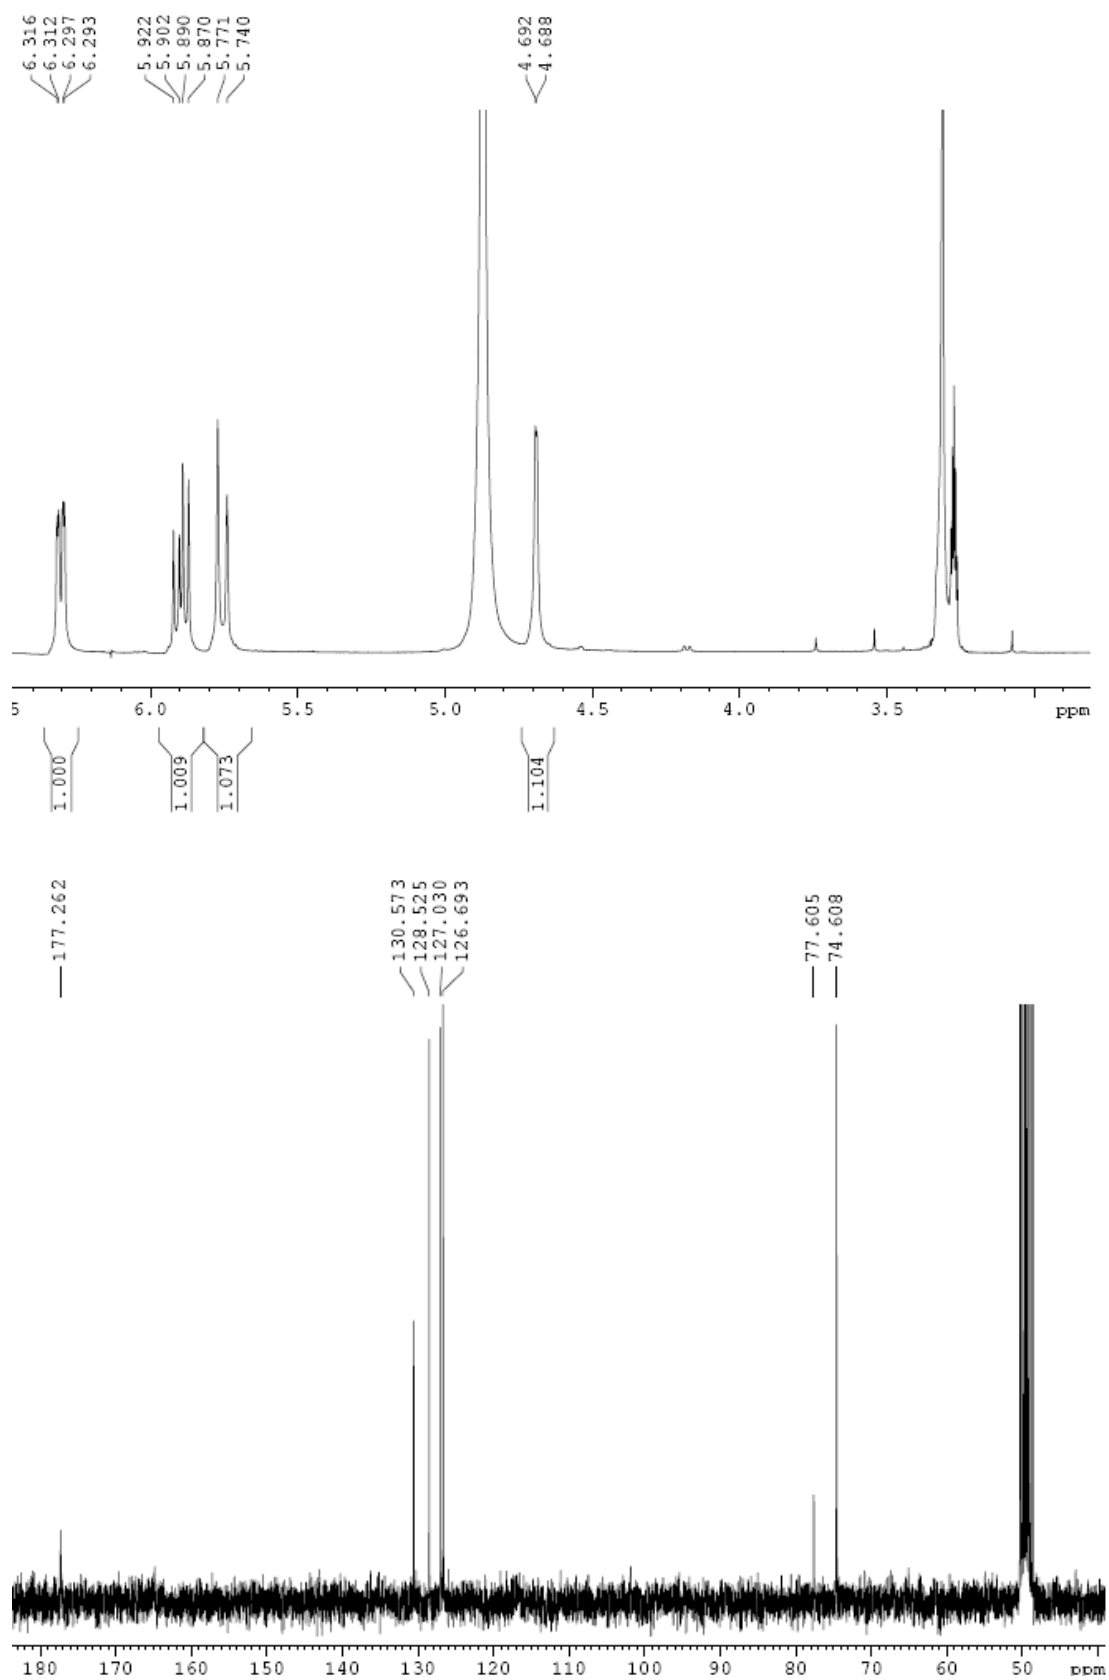

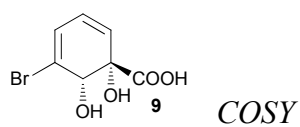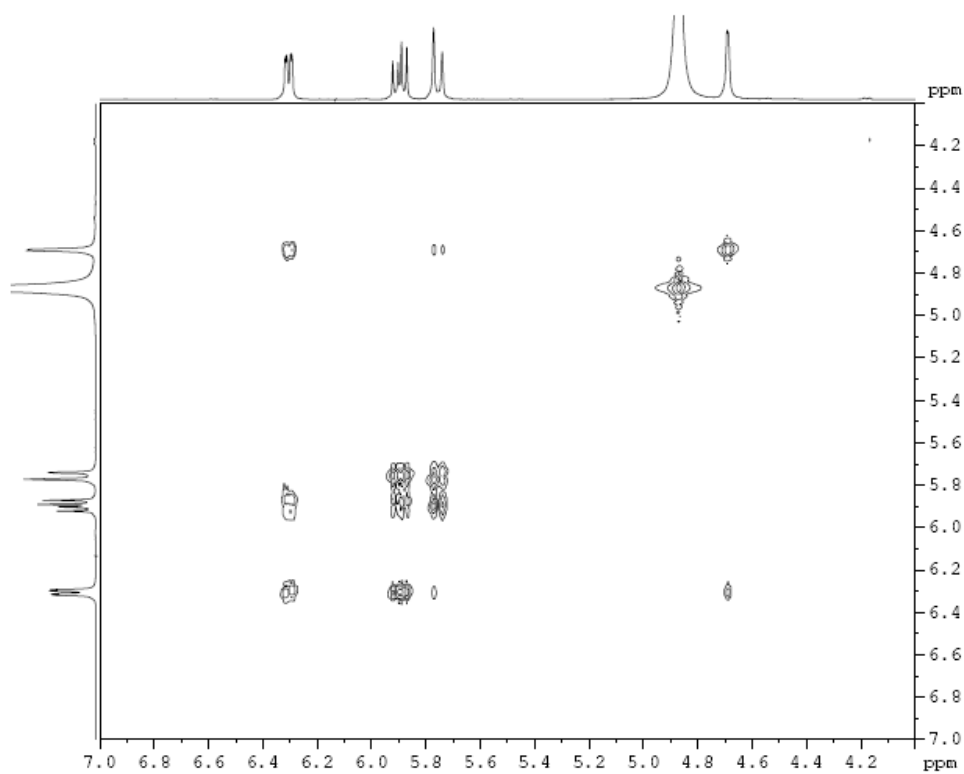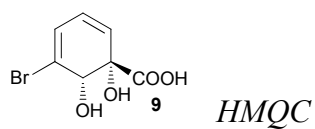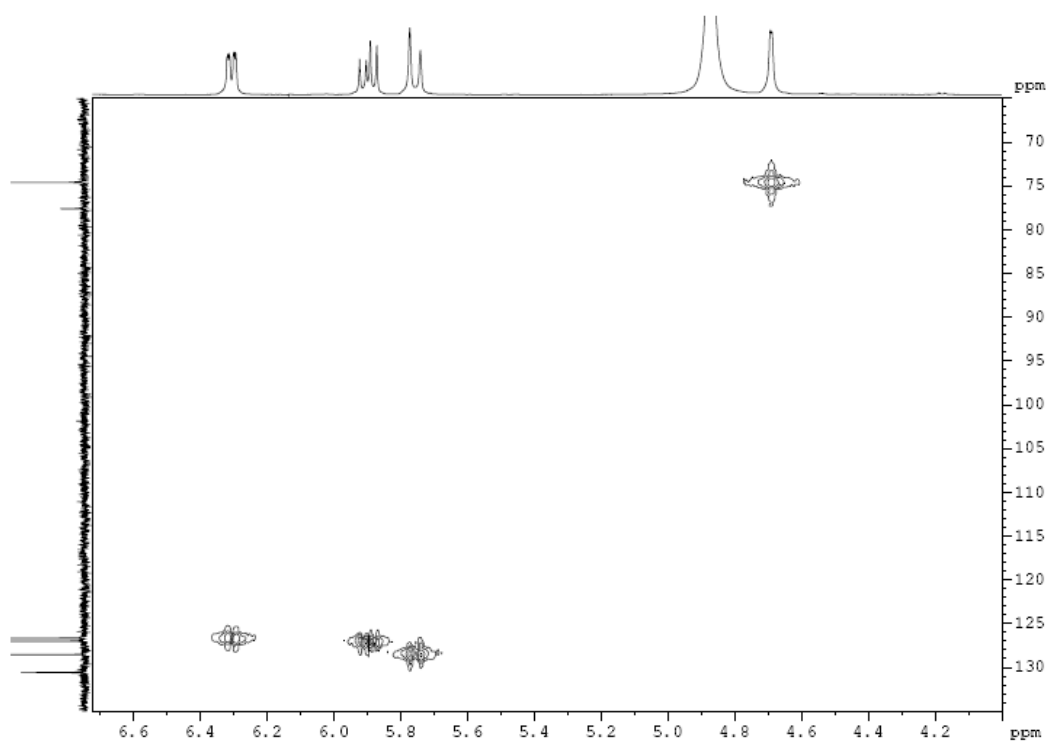

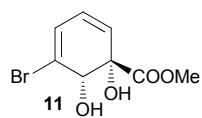

*crude*

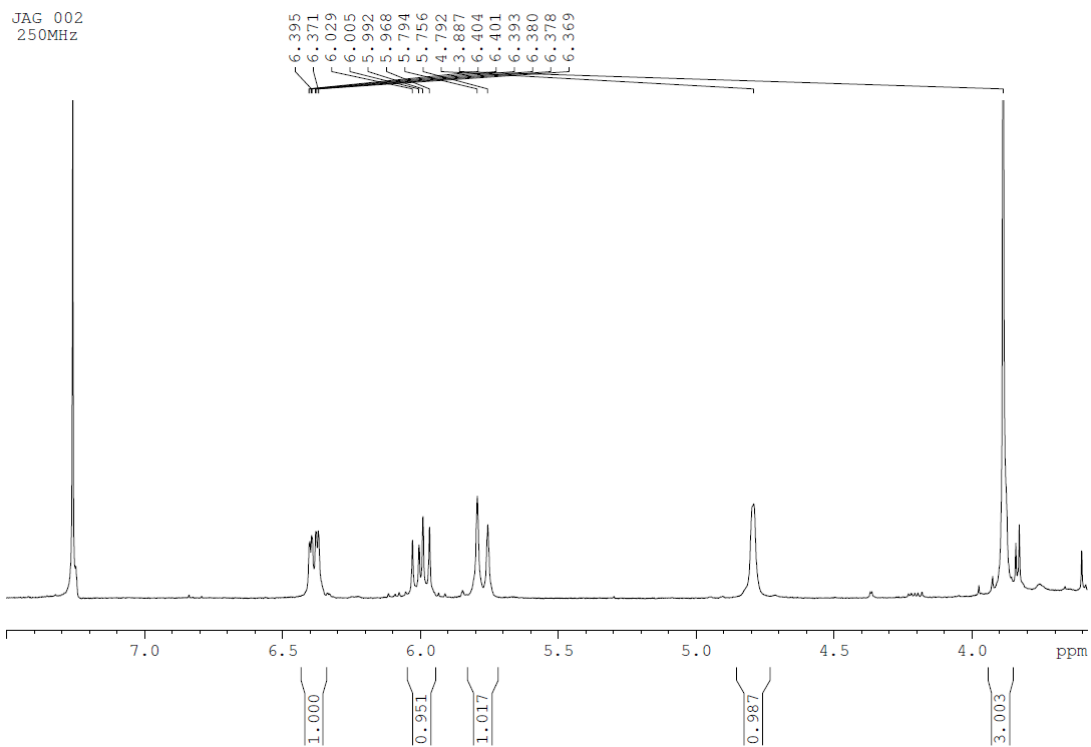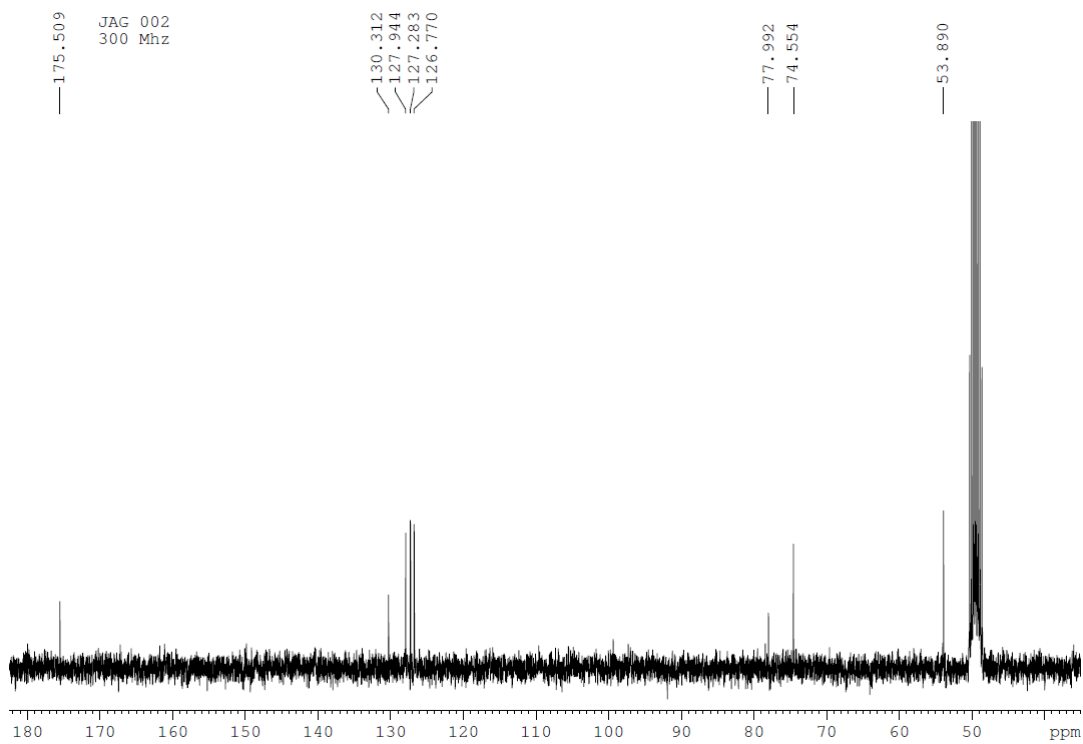

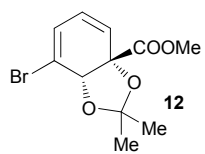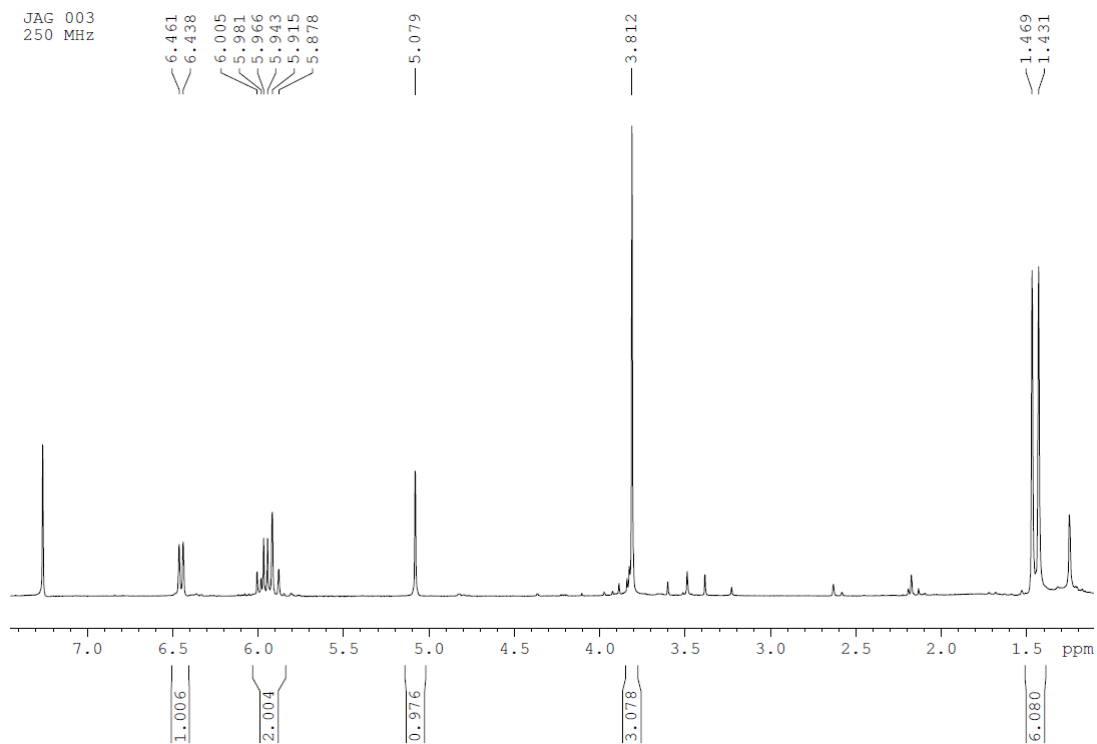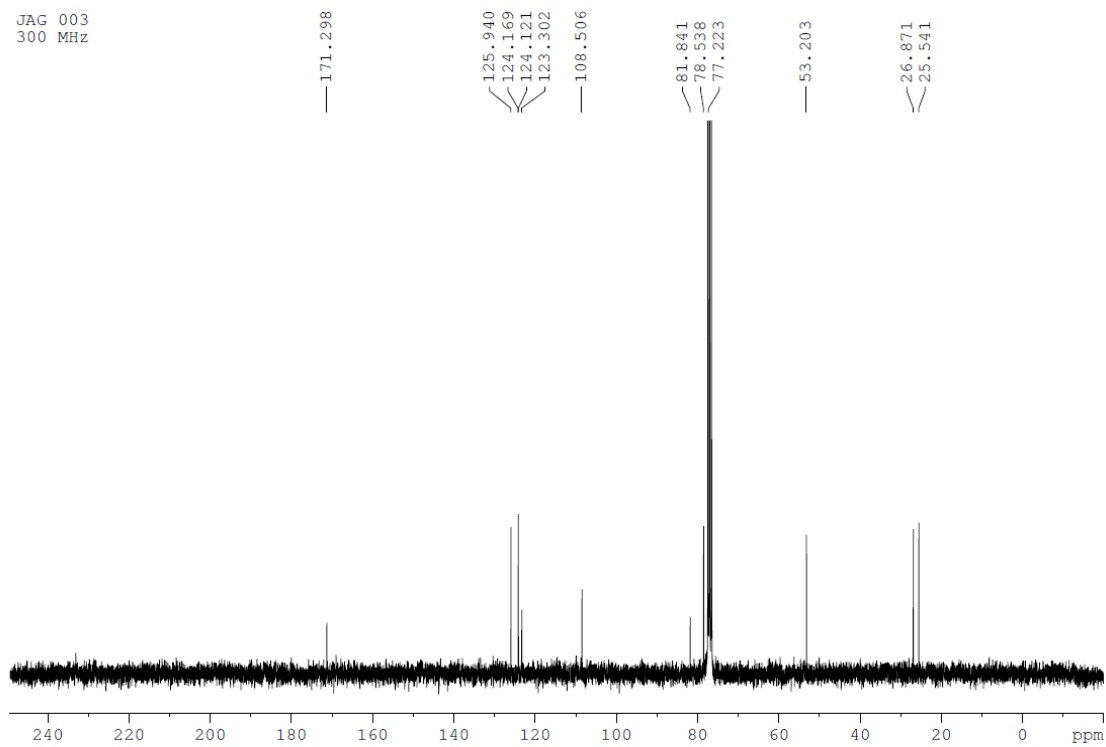

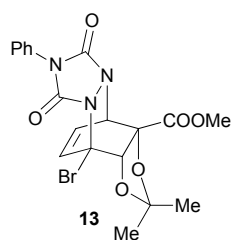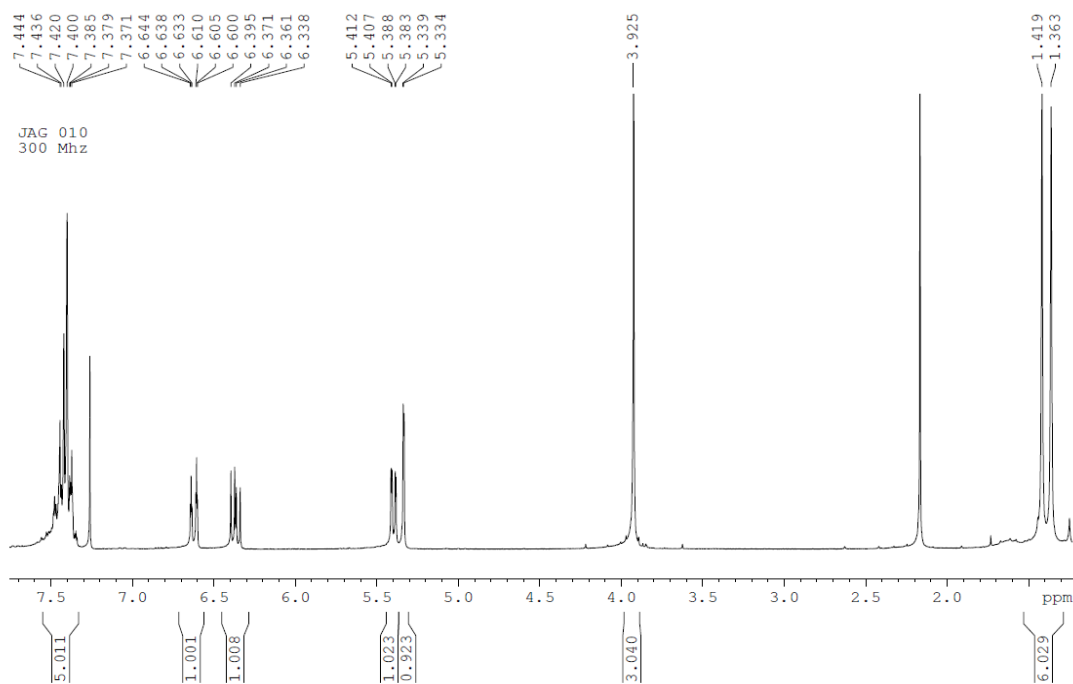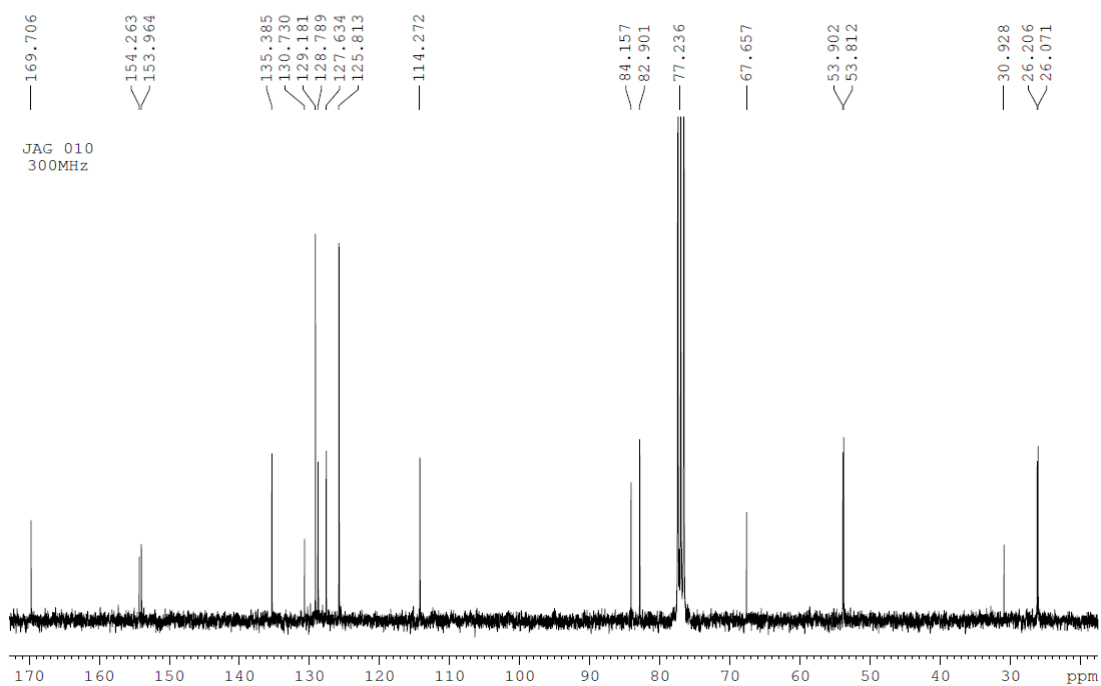

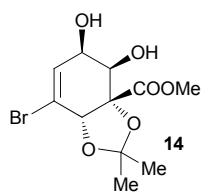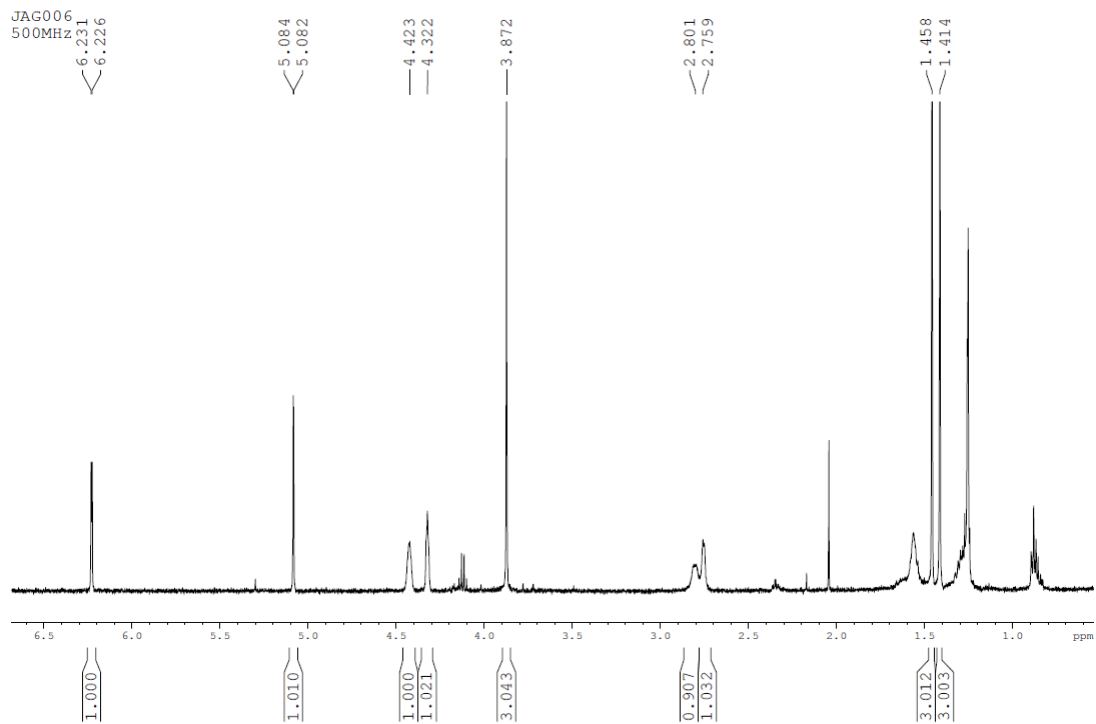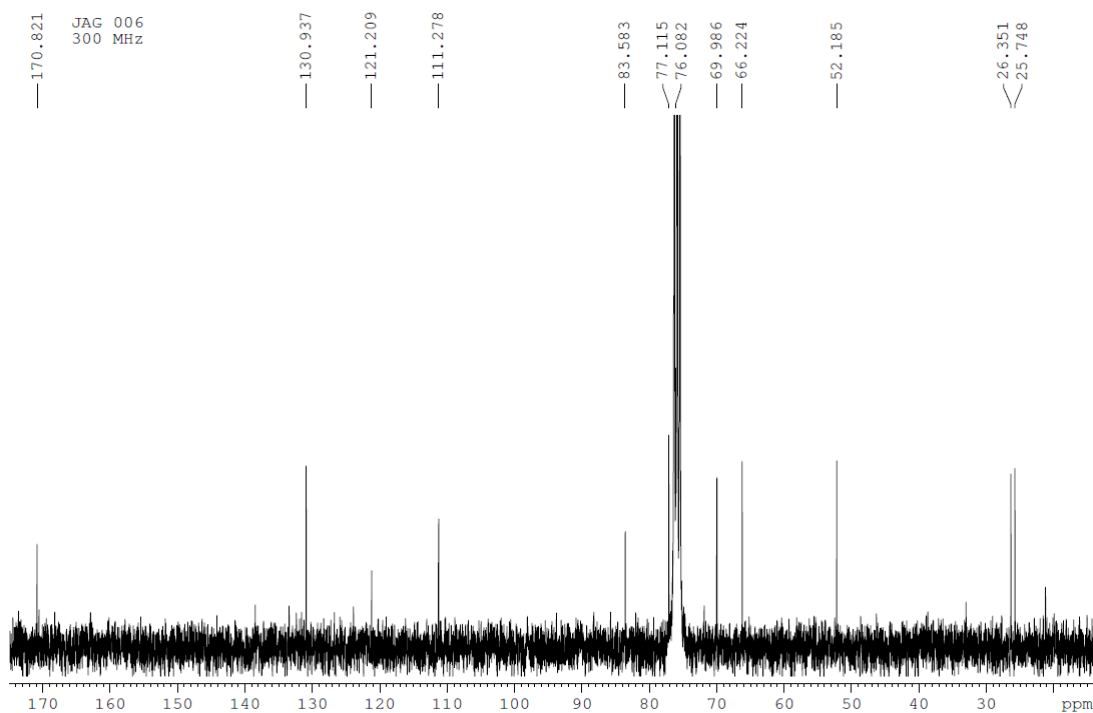

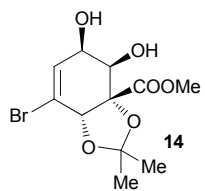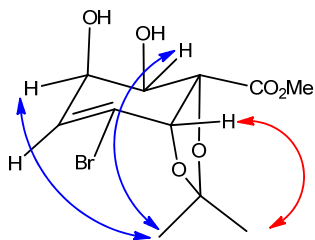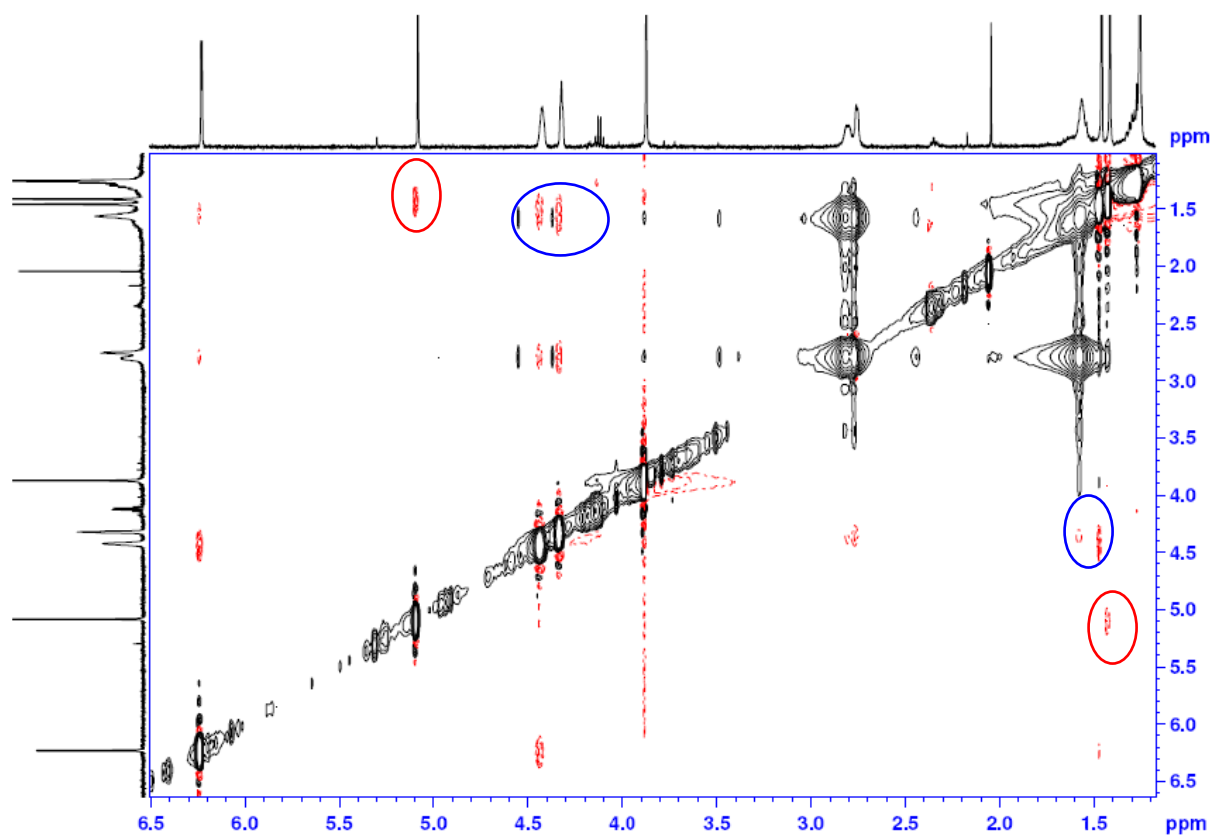



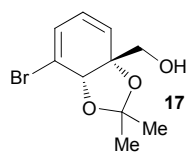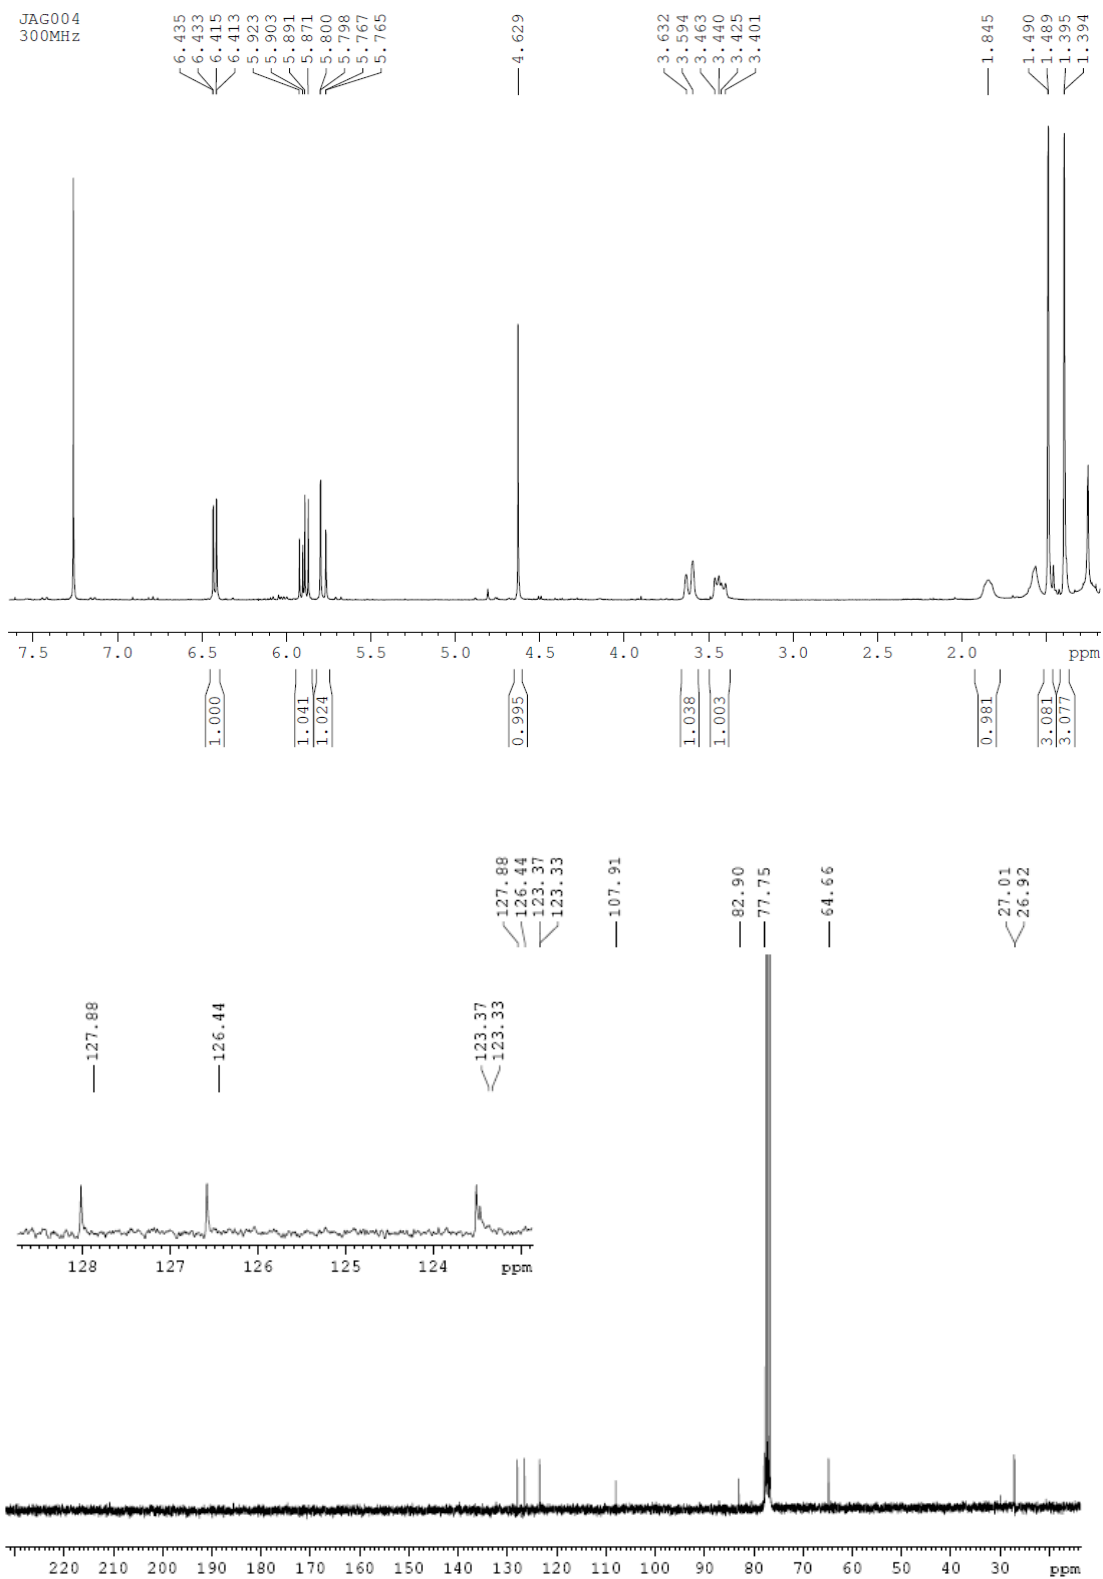

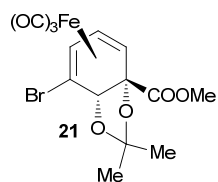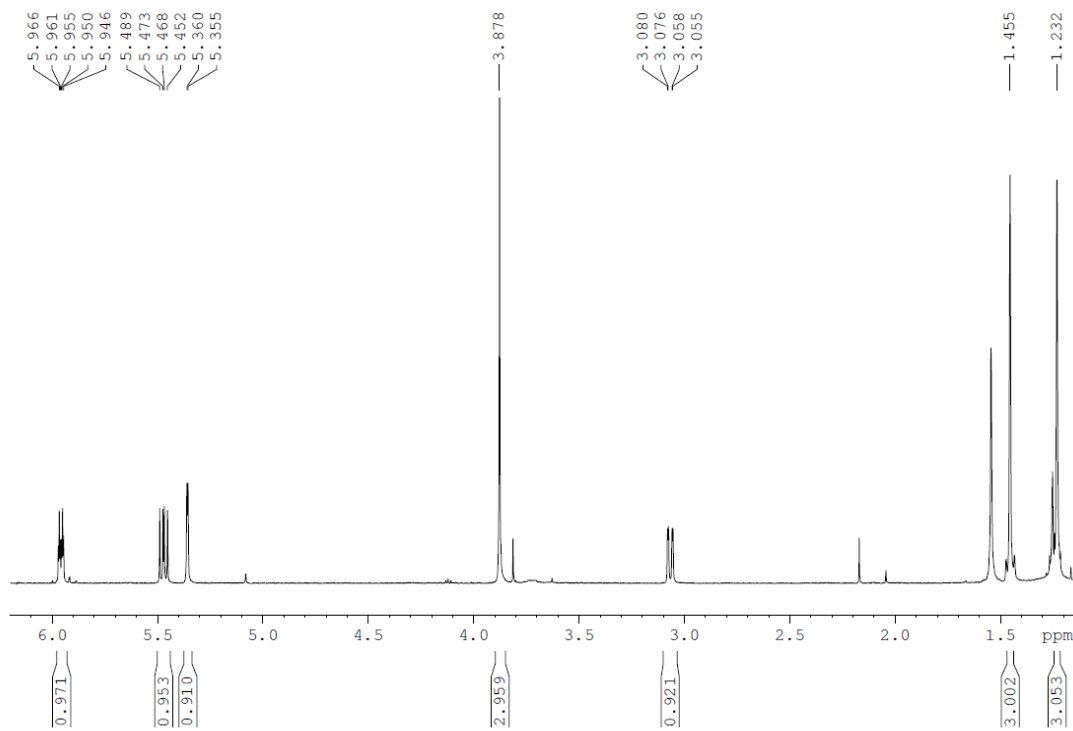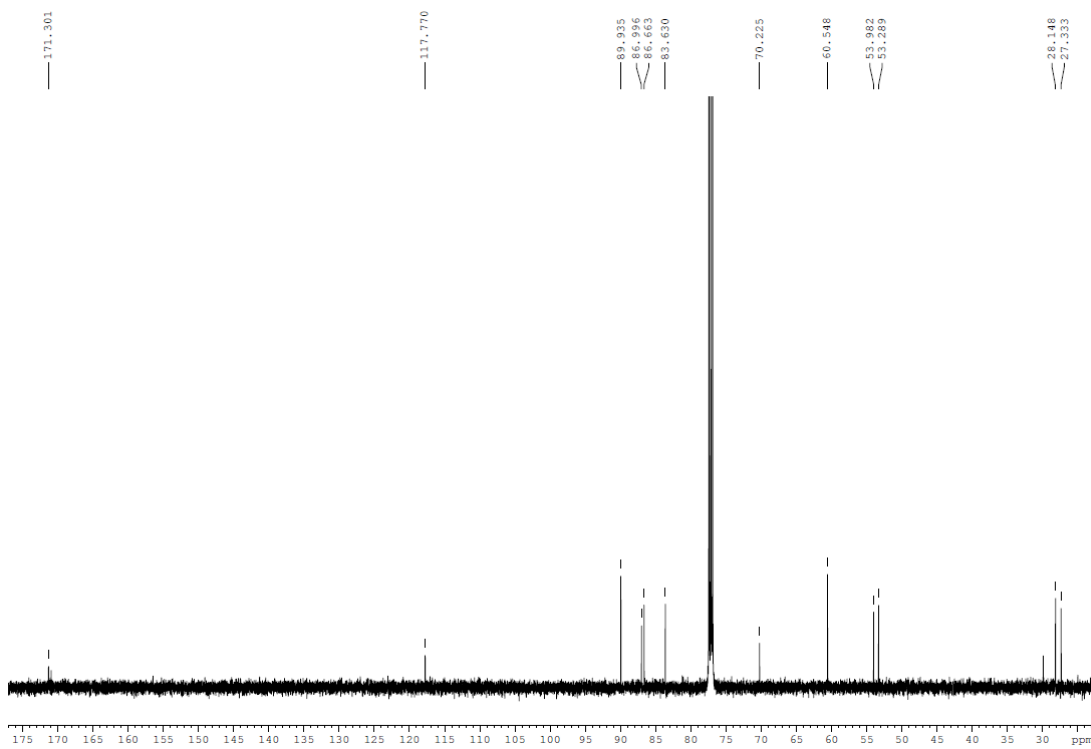

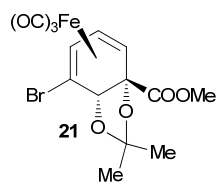

*HMQC*

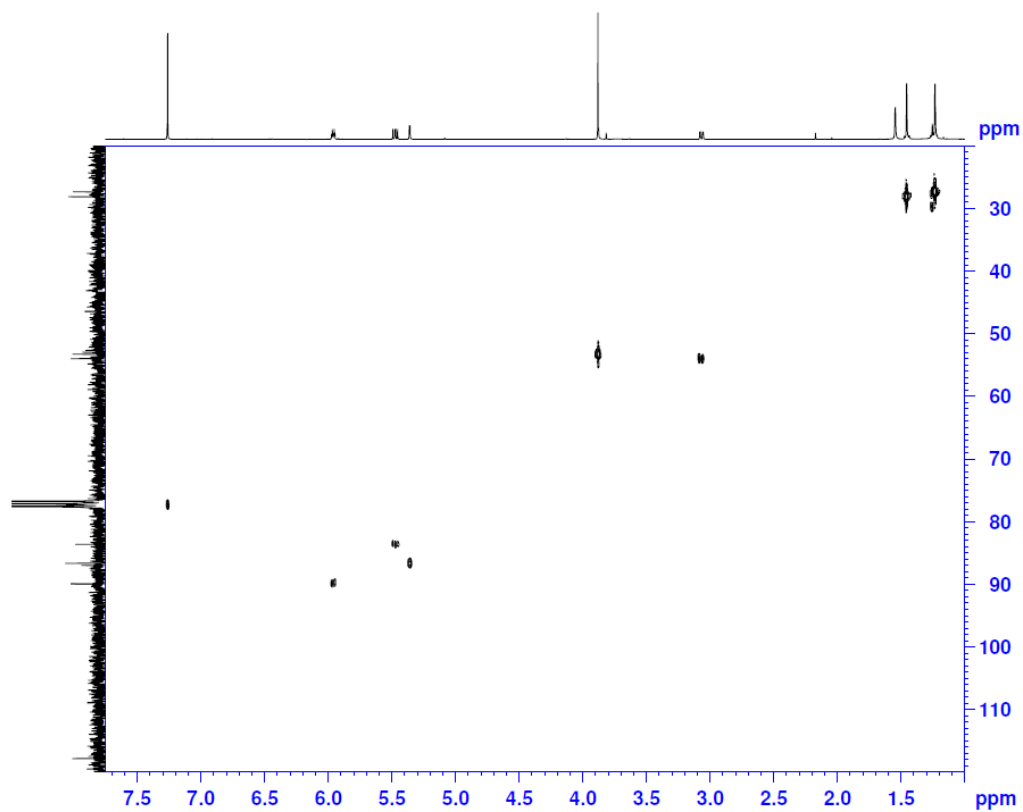

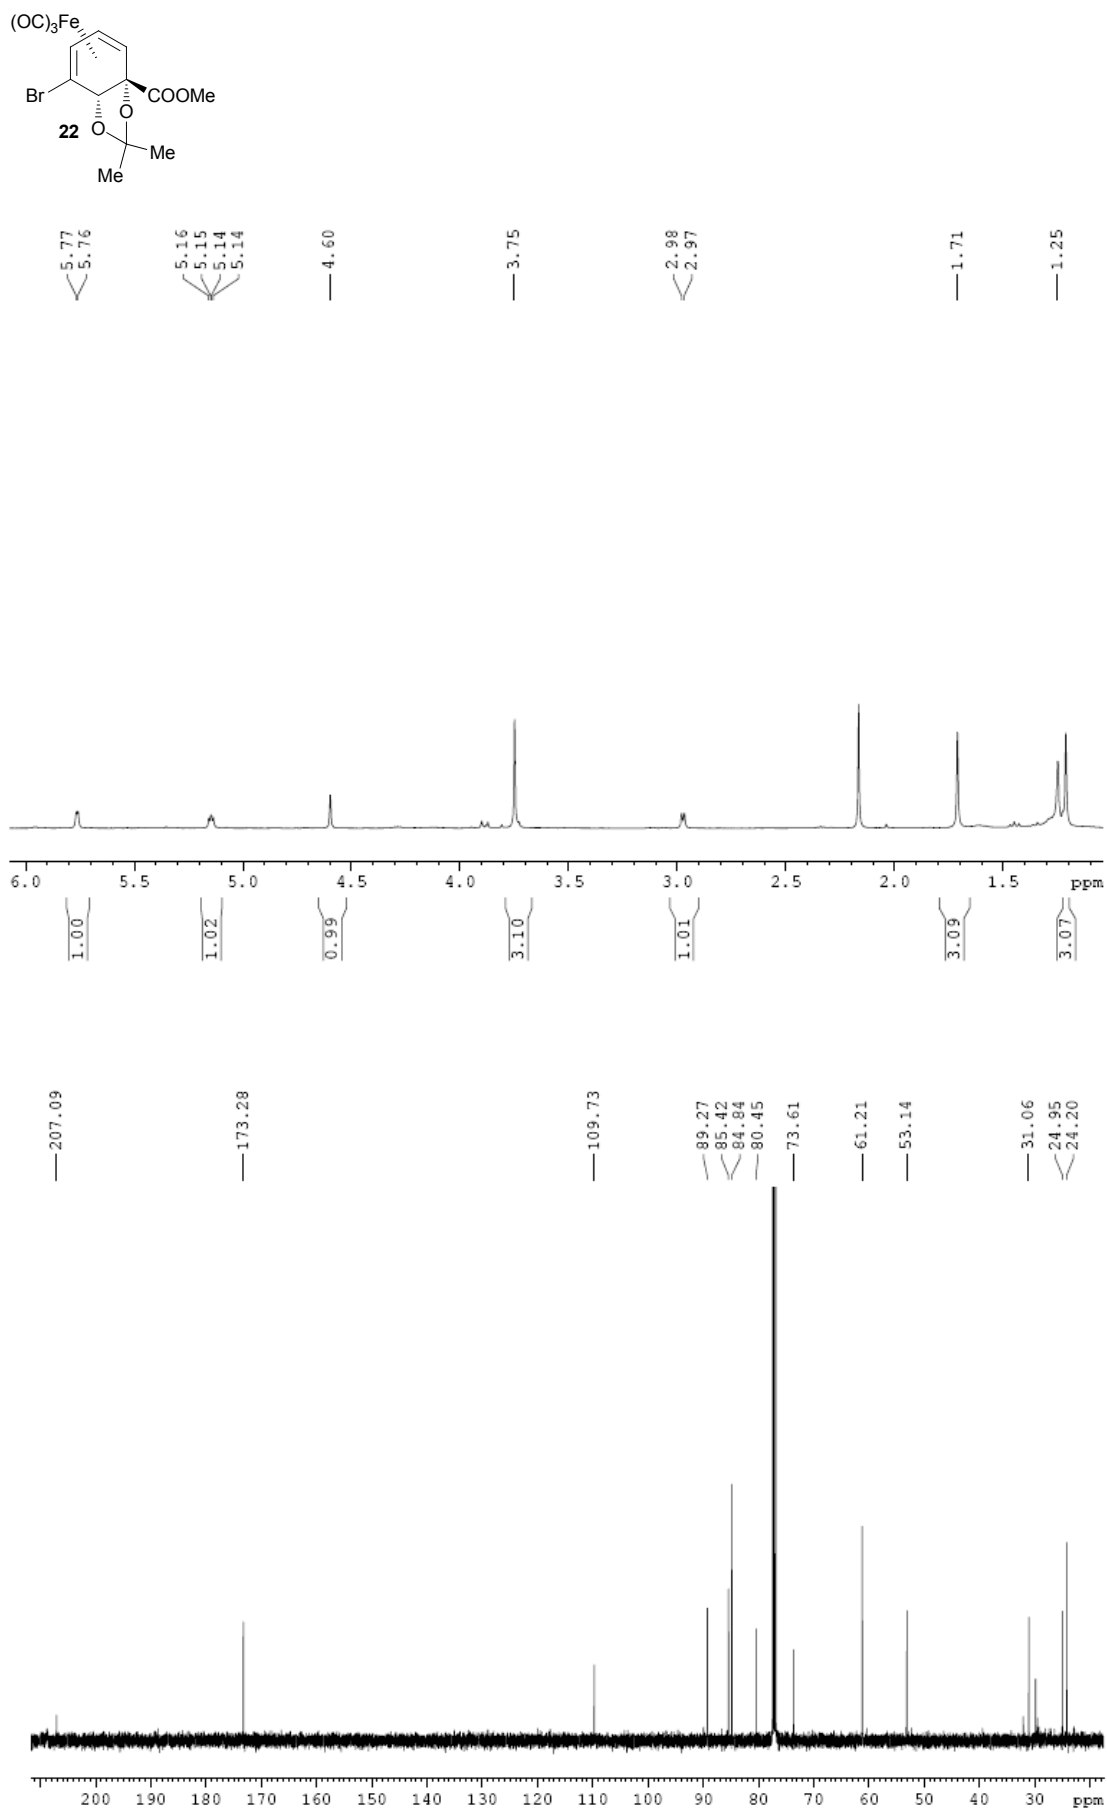

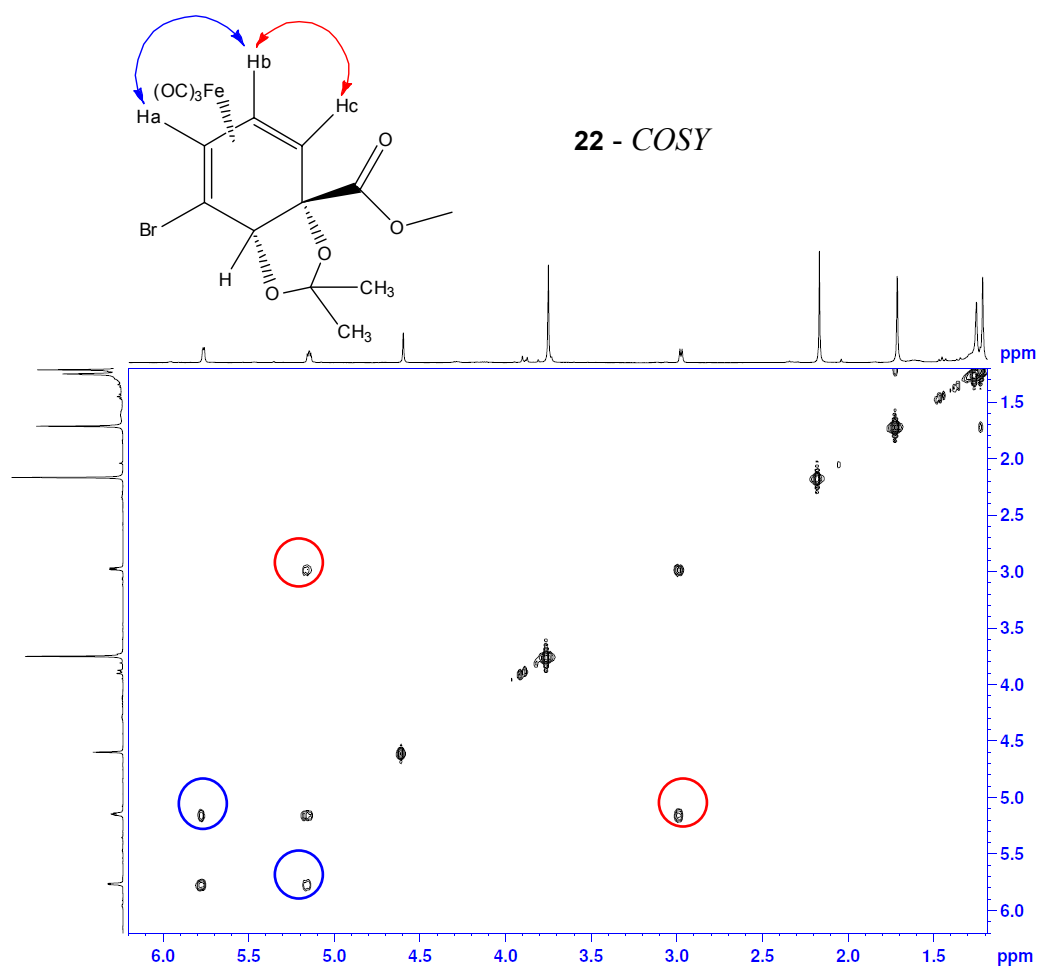

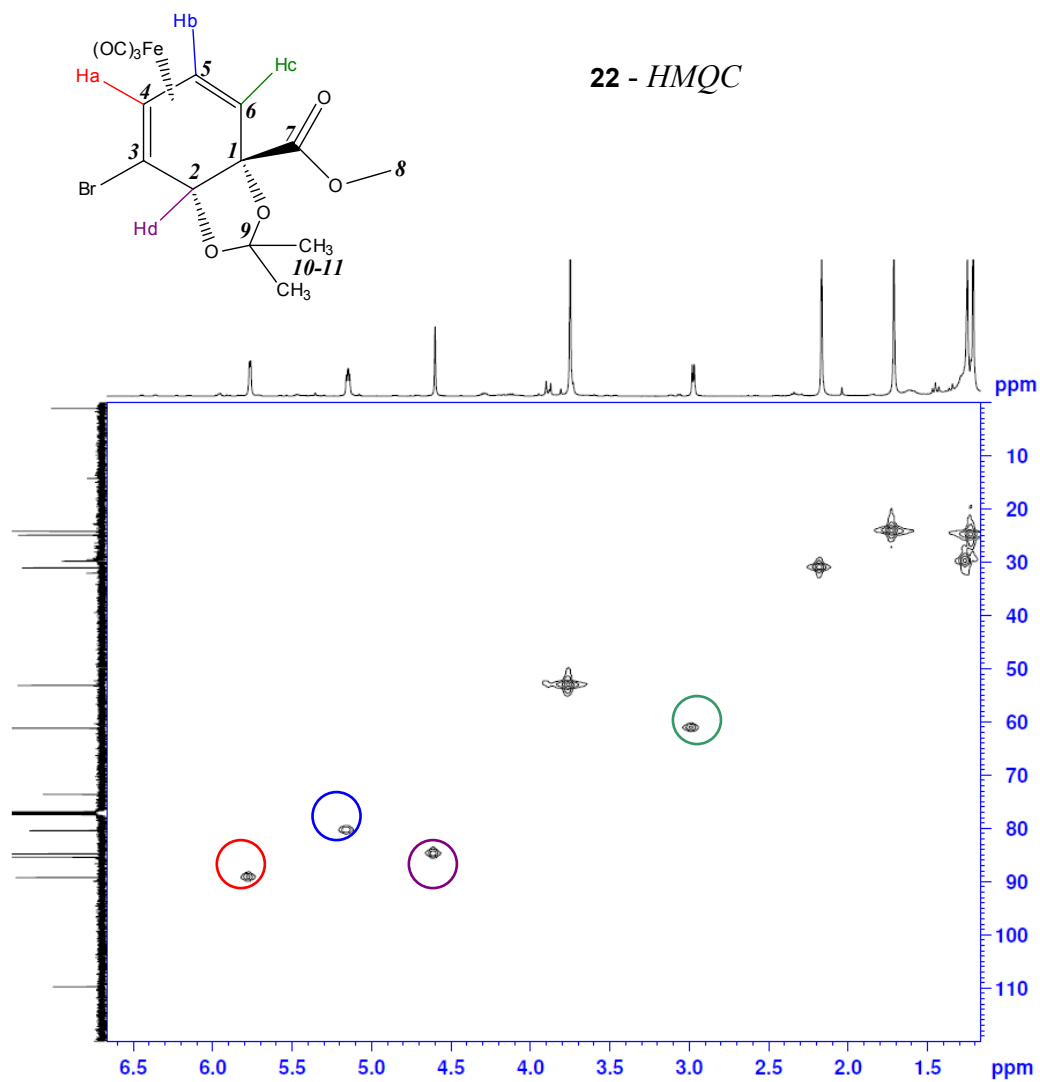

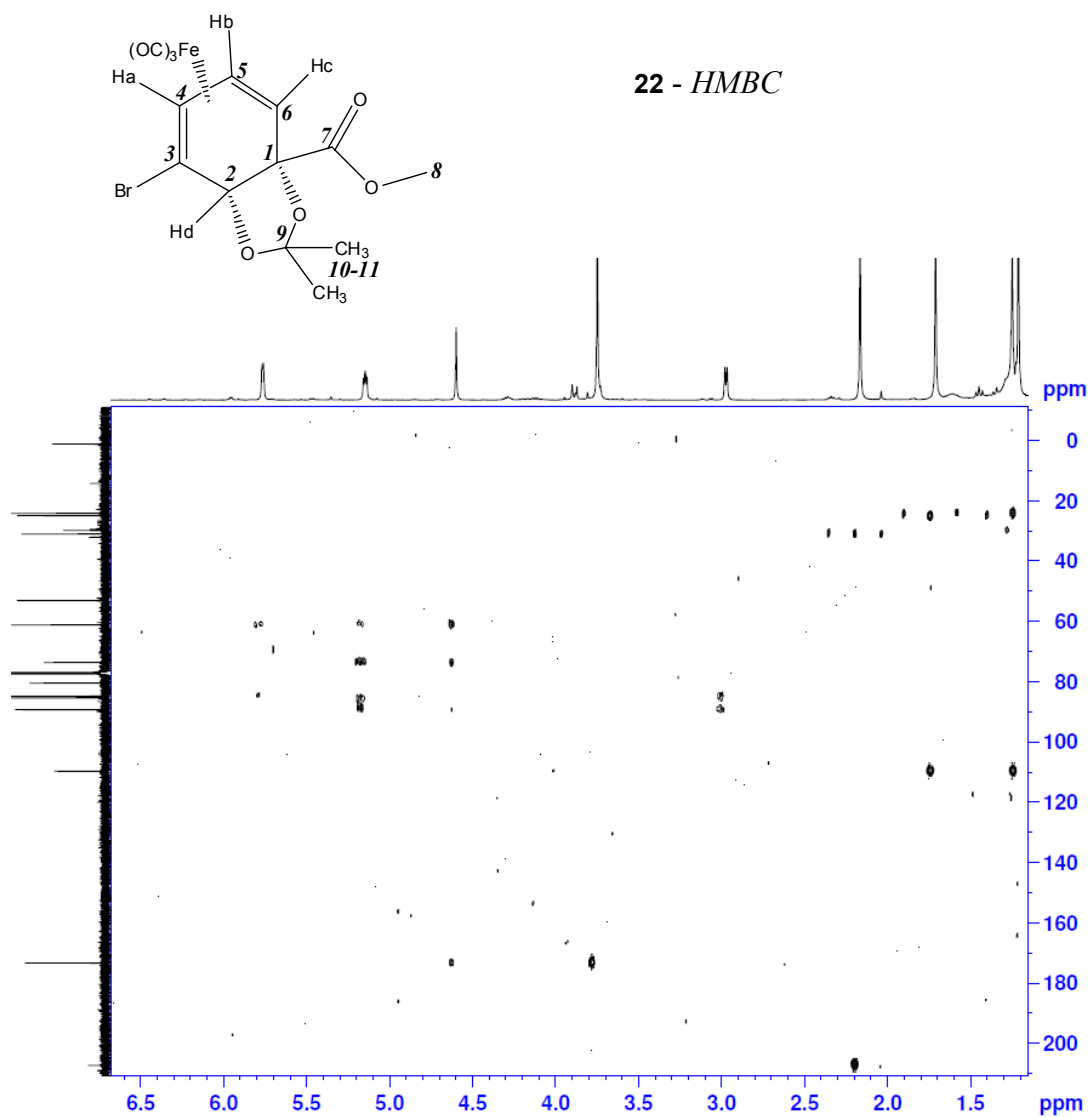

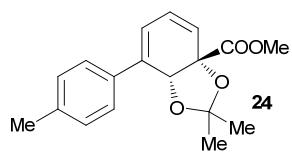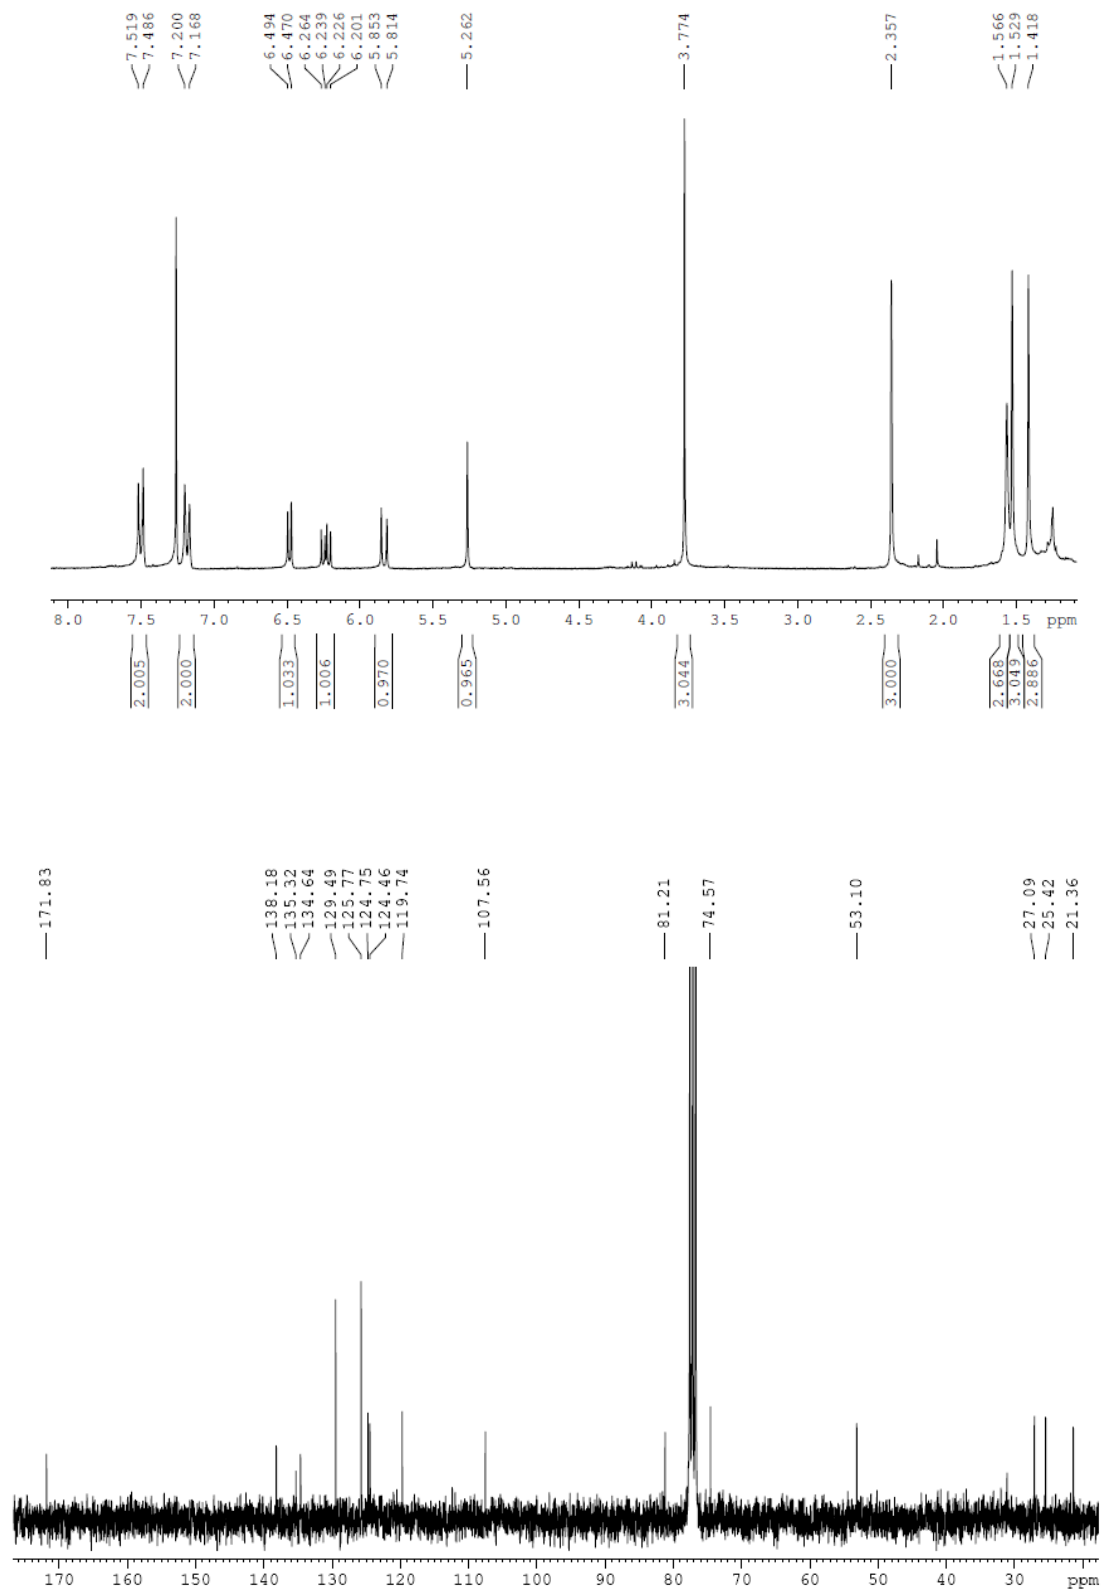



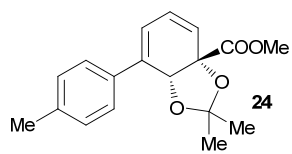

*HMQC*

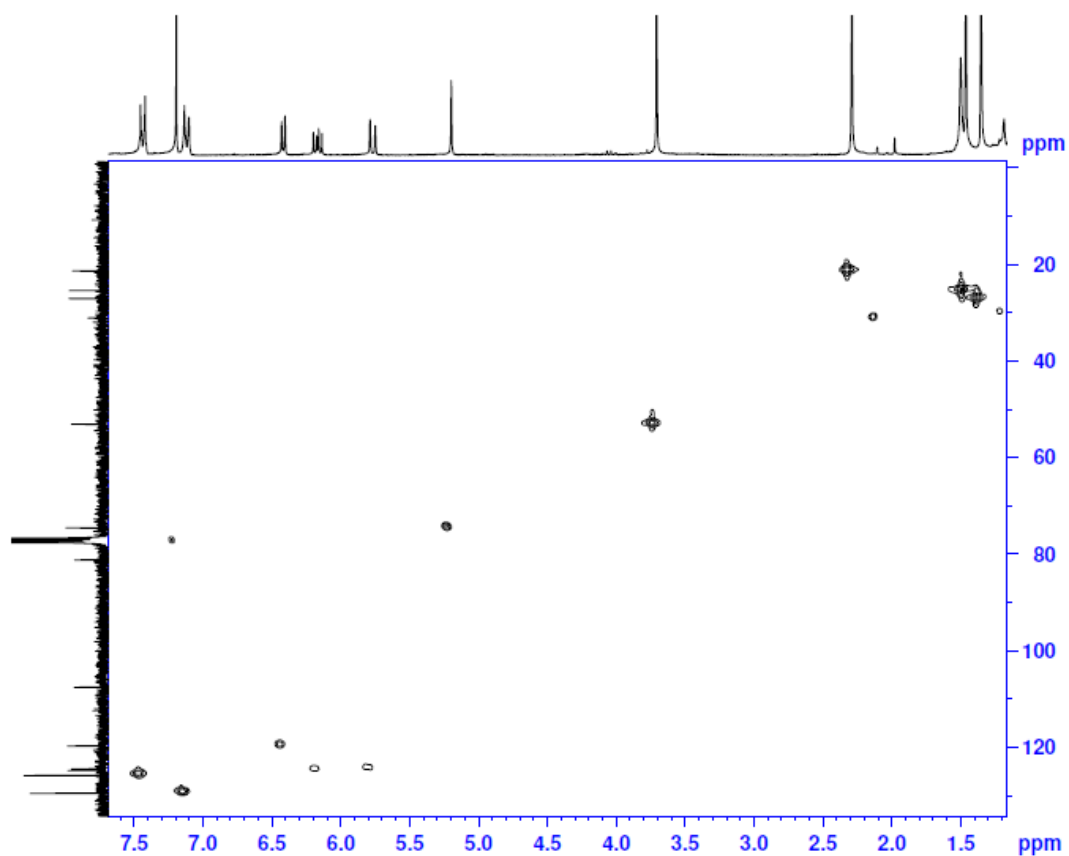

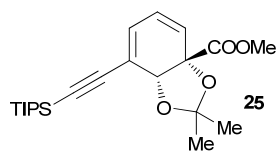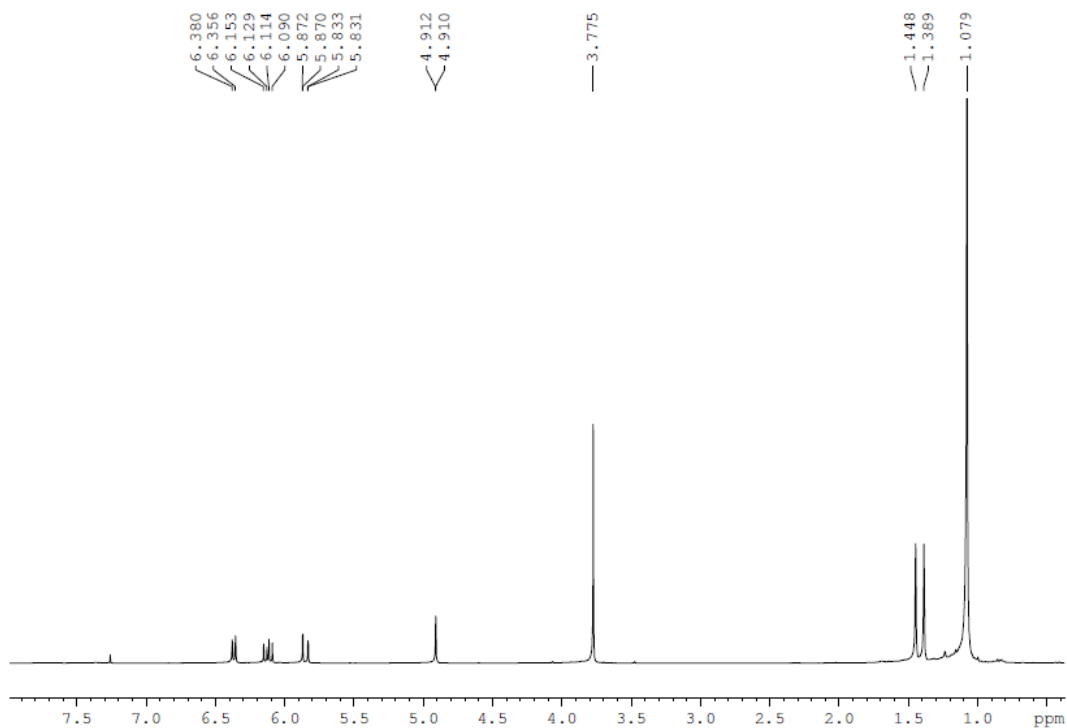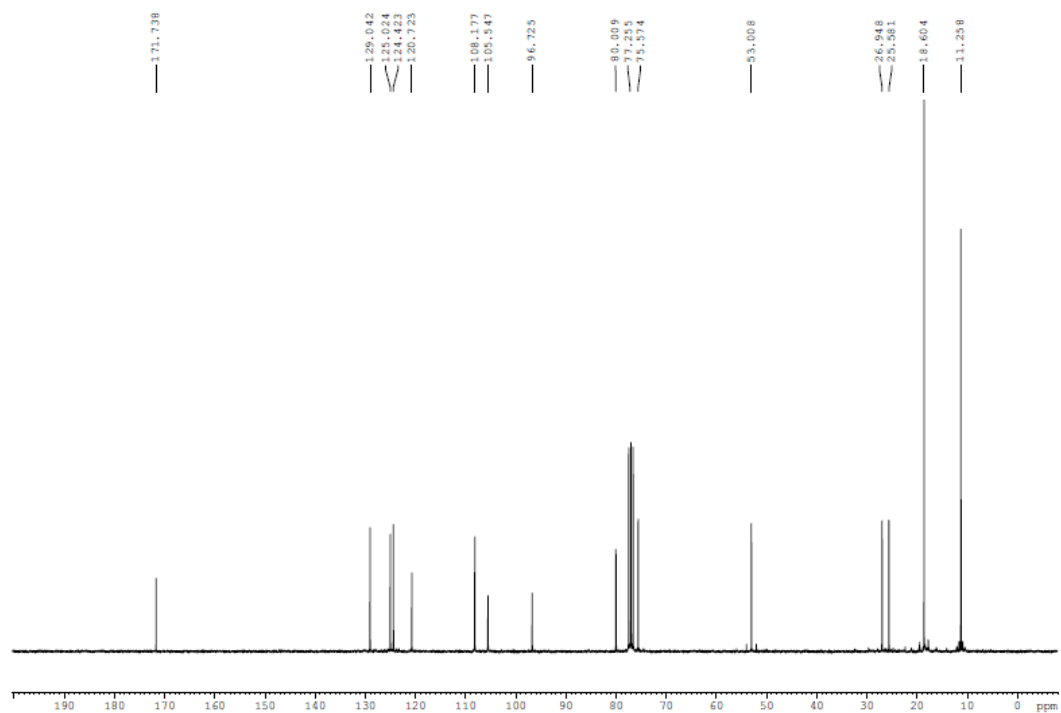

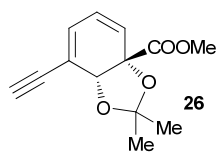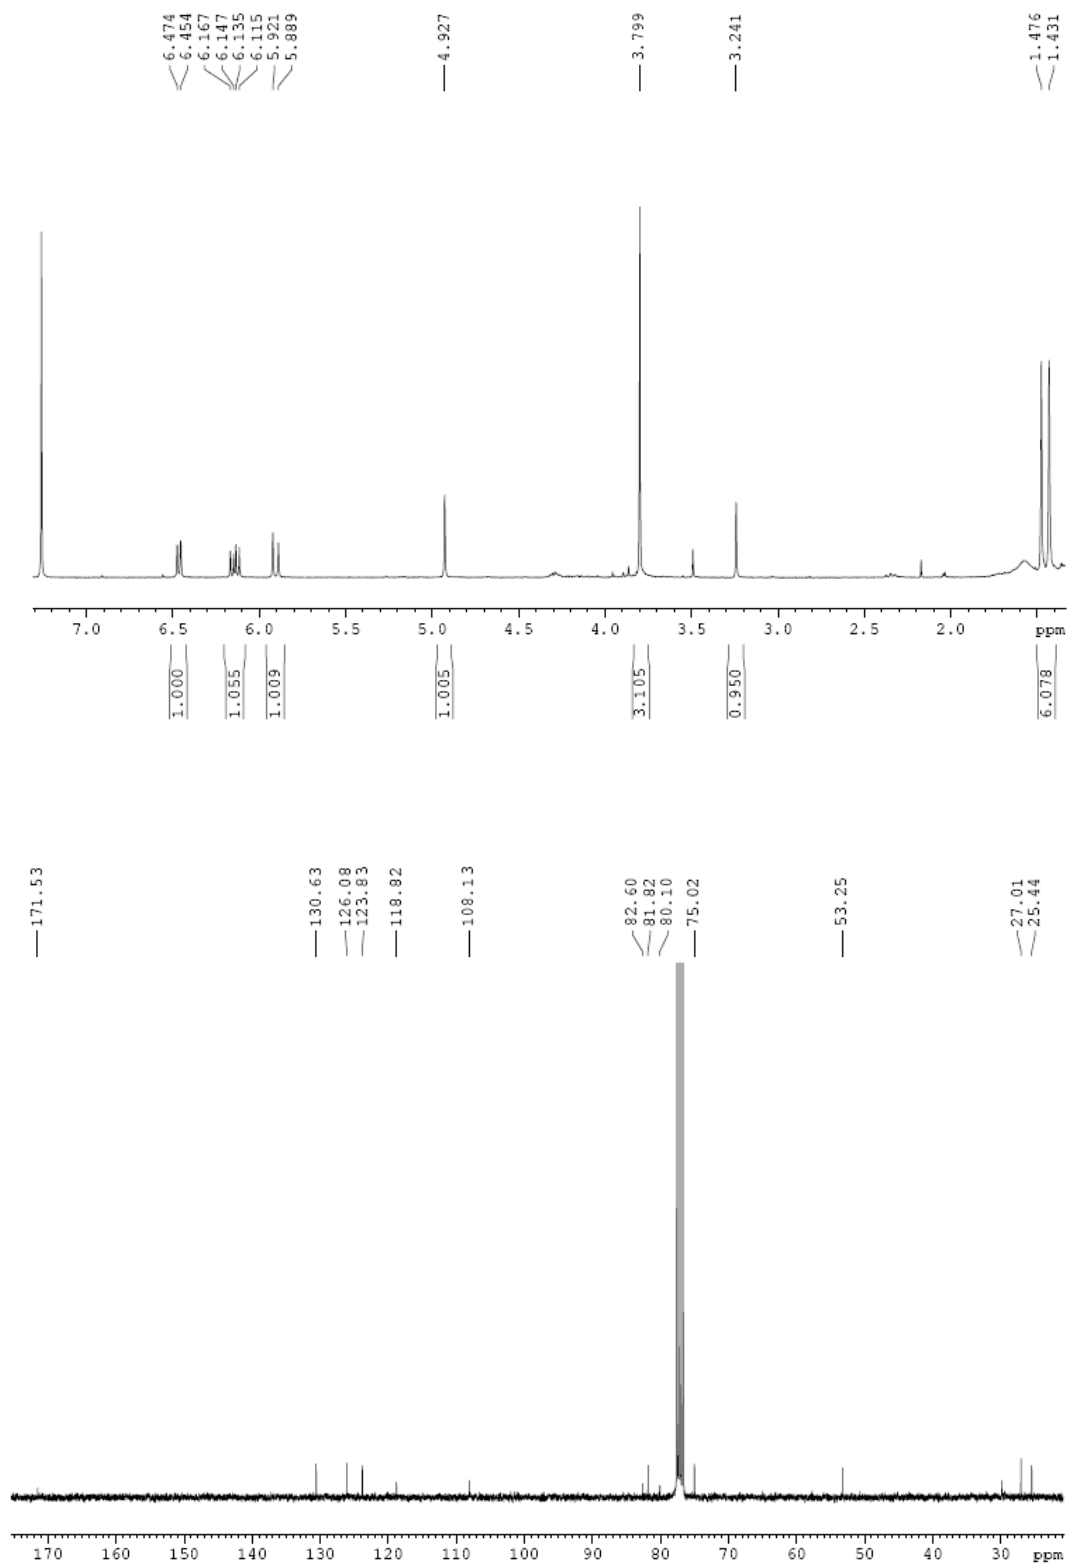

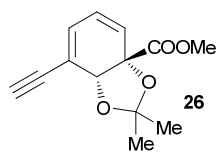

*HMQC*

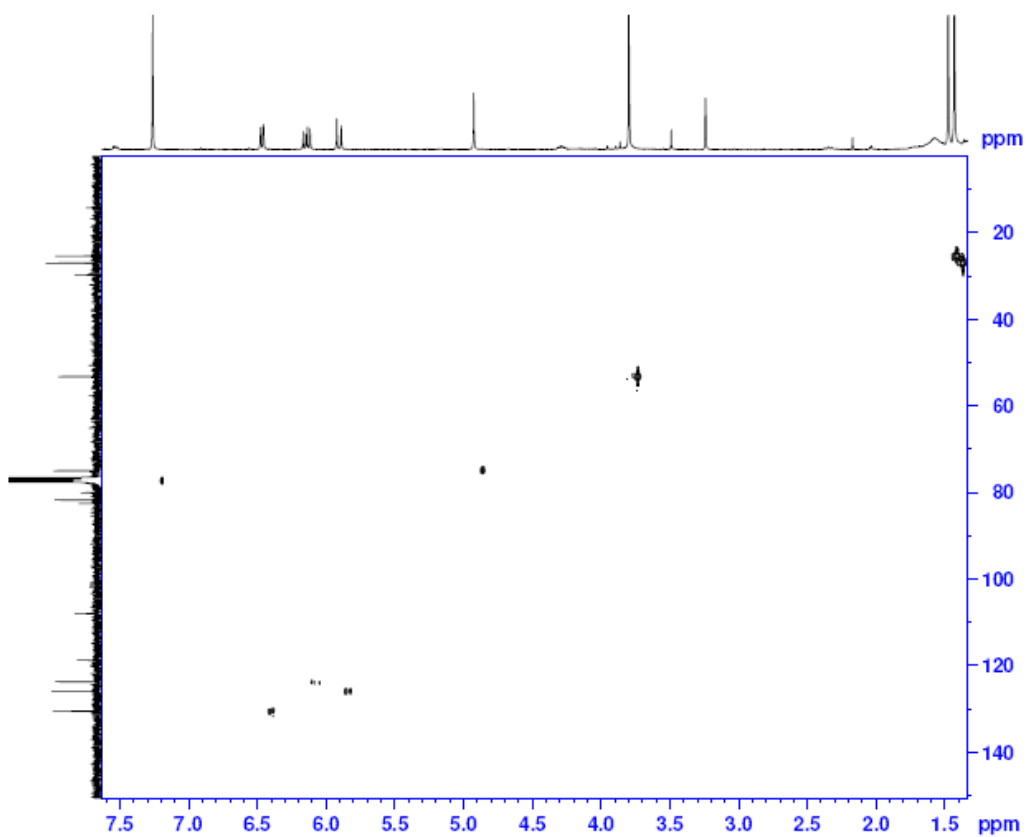

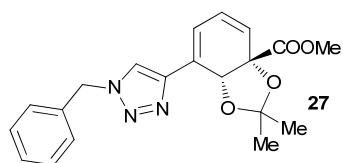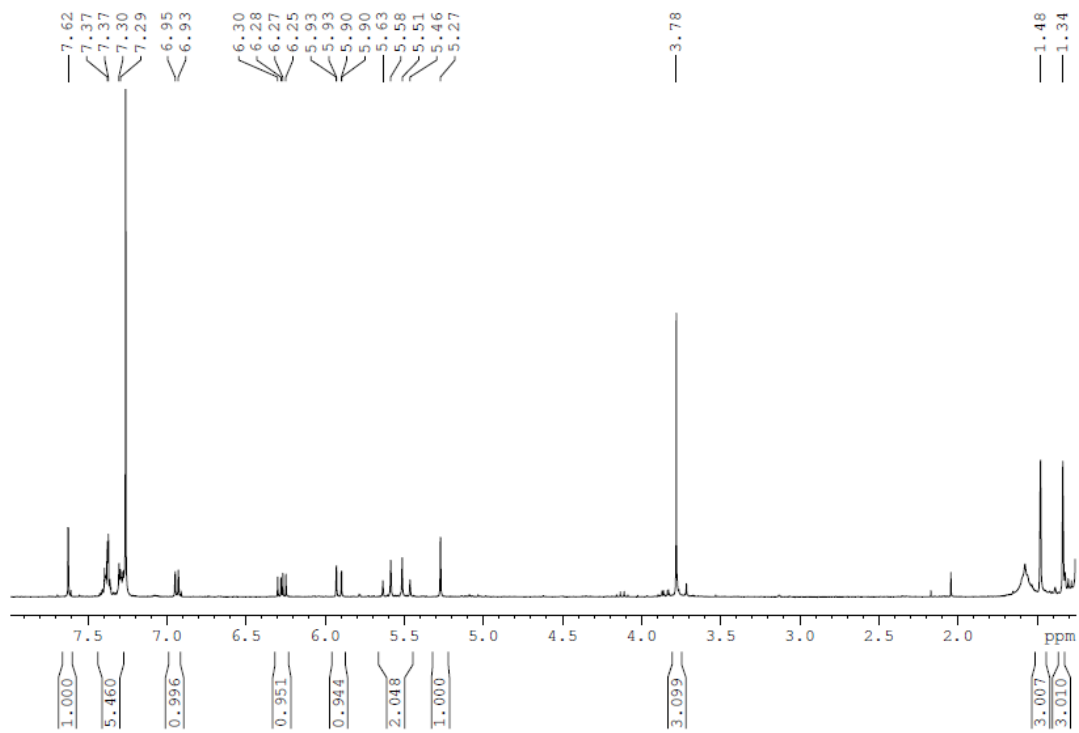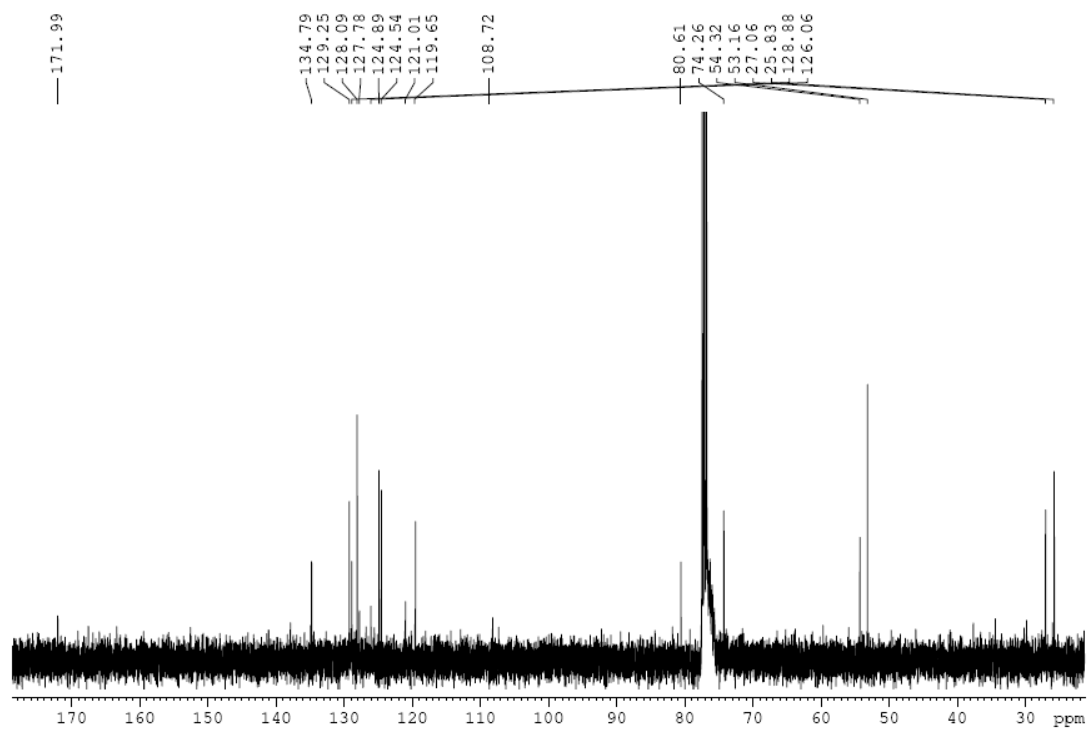

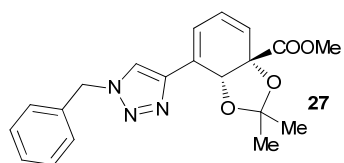

*COSY*

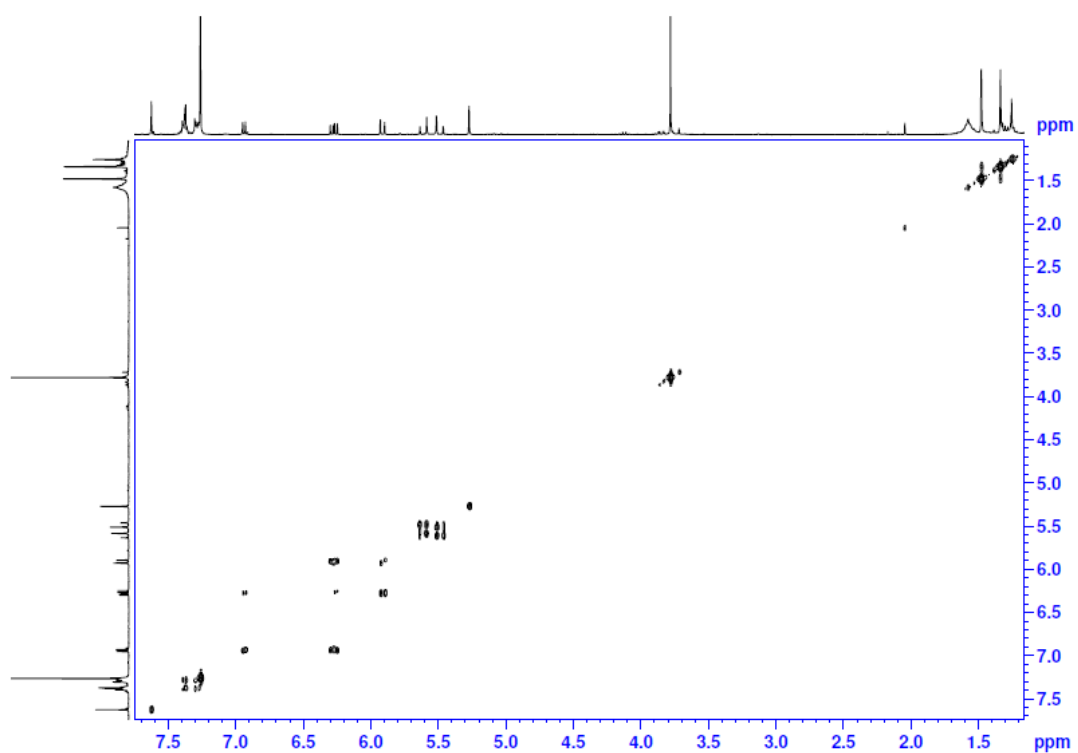

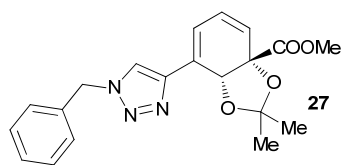

*HMQC*

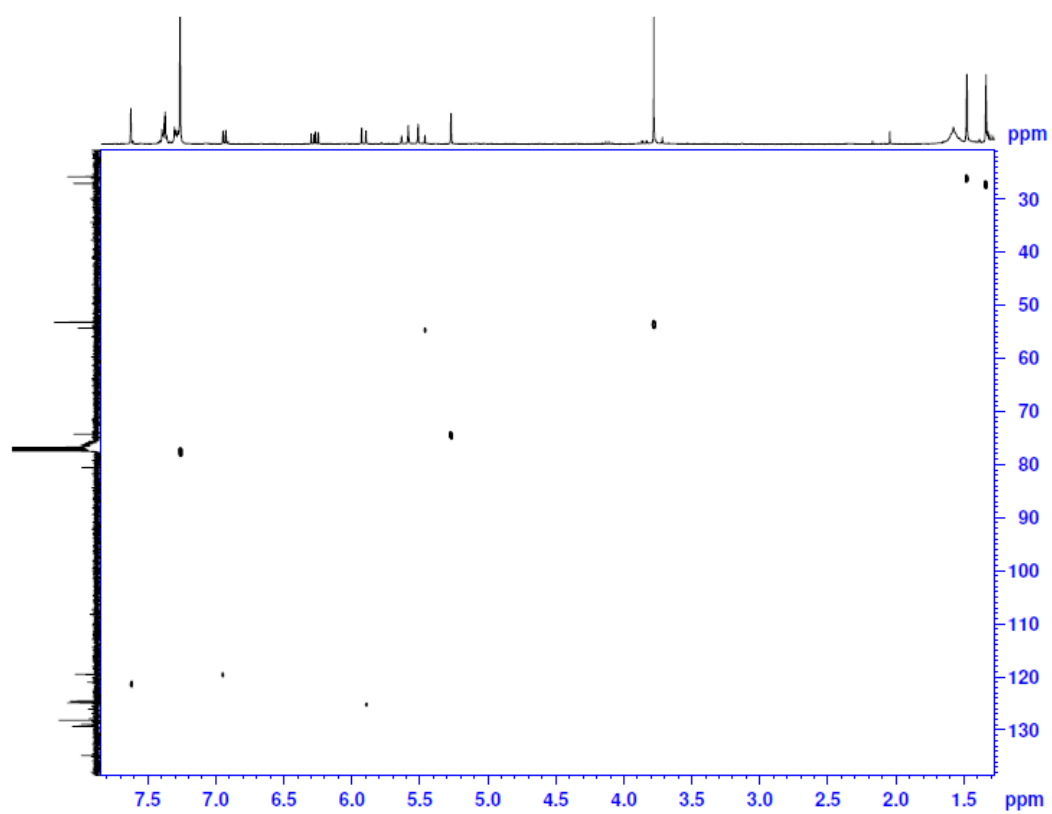

Table S1. Crystal data and structure refinement for **13**.

|                                   |                                                                                                                    |
|-----------------------------------|--------------------------------------------------------------------------------------------------------------------|
| Identification code               | p10sell                                                                                                            |
| Empirical formula                 | C19 H18 Br N3 O6                                                                                                   |
| Formula weight                    | 464.27                                                                                                             |
| Temperature                       | 150(2) K                                                                                                           |
| Wavelength                        | 1.54184 Å                                                                                                          |
| Crystal system, space group       | Hexagonal, P 6 <sub>5</sub>                                                                                        |
| Unit cell dimensions              | a = 27.8075(4) Å    alpha = 90 deg.<br>b = 27.8075(4) Å    beta = 90 deg.<br>c = 6.47080(10) Å    gamma = 120 deg. |
| Volume                            | 4333.24(11) Å <sup>3</sup>                                                                                         |
| Z, Calculated density             | 6, 1.067 Mg/m <sup>3</sup>                                                                                         |
| Absorption coefficient            | 2.196 mm <sup>-1</sup>                                                                                             |
| F(000)                            | 1416                                                                                                               |
| Crystal size                      | 0.40 x 0.20 x 0.10 mm                                                                                              |
| Theta range for data collection   | 4.86 to 66.74 deg.                                                                                                 |
| Limiting indices                  | -29<=h<=33, -33<=k<=33, -7<=l<=6                                                                                   |
| Reflections collected / unique    | 52878 / 4920 [R(int) = 0.0752]                                                                                     |
| Completeness to theta = 66.74     | 99.7 %                                                                                                             |
| Absorption correction             | Semi-empirical from equivalents                                                                                    |
| Max. and min. transmission        | 0.8103 and 0.4737                                                                                                  |
| Refinement method                 | Full-matrix least-squares on F <sup>2</sup>                                                                        |
| Data / restraints / parameters    | 4920 / 1 / 265                                                                                                     |
| Goodness-of-fit on F <sup>2</sup> | 1.086                                                                                                              |
| Final R indices [I>2sigma(I)]     | R1 = 0.0379, wR2 = 0.0850                                                                                          |
| R indices (all data)              | R1 = 0.0418, wR2 = 0.0864                                                                                          |
| Absolute structure parameter      | -0.003(17)                                                                                                         |
| Largest diff. peak and hole       | 0.324 and -0.221 e.Å <sup>-3</sup>                                                                                 |



Table S2. Atomic coordinates ( $\times 10^4$ ) and equivalent isotropic displacement parameters ( $\text{\AA}^2 \times 10^3$ ) for **13**.  
U(eq) is defined as one third of the trace of the orthogonalized Uij tensor.

|       | x        | y        | z         | U(eq)  |
|-------|----------|----------|-----------|--------|
| Br    | 2656 (1) | 3496 (1) | 1396 (1)  | 43 (1) |
| N(1)  | 3443 (1) | 4763 (1) | 5658 (4)  | 32 (1) |
| N(2)  | 3363 (1) | 4342 (1) | 4164 (4)  | 31 (1) |
| N(3)  | 3941 (1) | 4384 (1) | 6624 (4)  | 32 (1) |
| O(1)  | 3353 (1) | 5646 (1) | 1551 (5)  | 52 (1) |
| O(2)  | 3505 (1) | 5901 (1) | 4867 (5)  | 58 (1) |
| O(3)  | 2296 (1) | 4960 (1) | 4150 (4)  | 39 (1) |
| O(4)  | 2154 (1) | 4293 (1) | 1759 (4)  | 41 (1) |
| O(5)  | 3900 (1) | 5036 (1) | 8774 (4)  | 48 (1) |
| O(6)  | 3680 (1) | 3703 (1) | 4114 (4)  | 39 (1) |
| C(1)  | 3764 (2) | 6209 (2) | 931 (9)   | 78 (2) |
| C(2)  | 3265 (1) | 5555 (1) | 3586 (6)  | 41 (1) |
| C(3)  | 2808 (1) | 4963 (1) | 4040 (5)  | 34 (1) |
| C(4)  | 1944 (1) | 4643 (1) | 2445 (6)  | 39 (1) |
| C(5)  | 1985 (2) | 5028 (2) | 692 (6)   | 52 (1) |
| C(6)  | 1368 (1) | 4292 (2) | 3254 (8)  | 57 (1) |
| C(7)  | 2709 (1) | 4514 (1) | 2396 (5)  | 30 (1) |
| C(8)  | 2780 (1) | 4053 (1) | 3469 (5)  | 32 (1) |
| C(9)  | 2394 (1) | 3820 (1) | 5281 (6)  | 41 (1) |
| C(10) | 2475 (1) | 4202 (2) | 6661 (6)  | 40 (1) |
| C(11) | 2924 (1) | 4773 (1) | 6118 (5)  | 34 (1) |
| C(12) | 3773 (1) | 4758 (1) | 7250 (5)  | 36 (1) |
| C(13) | 3653 (1) | 4085 (1) | 4888 (5)  | 32 (1) |
| C(14) | 4364 (1) | 4322 (1) | 7660 (5)  | 31 (1) |
| C(15) | 4269 (1) | 4105 (1) | 9630 (6)  | 36 (1) |
| C(16) | 4688 (1) | 4064 (1) | 10624 (5) | 38 (1) |
| C(17) | 5191 (1) | 4233 (1) | 9630 (6)  | 38 (1) |
| C(18) | 5280 (1) | 4448 (1) | 7676 (5)  | 35 (1) |
| C(19) | 4868 (1) | 4502 (1) | 6662 (5)  | 35 (1) |

Table S3. Bond lengths [Å] for **13**.

---

|             |          |
|-------------|----------|
| Br-C(8)     | 1.945(3) |
| N(1)-C(12)  | 1.384(4) |
| N(1)-N(2)   | 1.447(3) |
| N(1)-C(11)  | 1.487(4) |
| N(2)-C(13)  | 1.398(4) |
| N(2)-C(8)   | 1.475(4) |
| N(3)-C(13)  | 1.389(4) |
| N(3)-C(12)  | 1.396(4) |
| N(3)-C(14)  | 1.438(4) |
| O(1)-C(2)   | 1.340(5) |
| O(1)-C(1)   | 1.458(5) |
| O(2)-C(2)   | 1.189(5) |
| O(3)-C(3)   | 1.419(3) |
| O(3)-C(4)   | 1.446(4) |
| O(4)-C(7)   | 1.408(4) |
| O(4)-C(4)   | 1.432(4) |
| O(5)-C(12)  | 1.193(4) |
| O(6)-C(13)  | 1.210(4) |
| C(1)-H(1A)  | 0.9800   |
| C(1)-H(1B)  | 0.9800   |
| C(1)-H(1C)  | 0.9800   |
| C(2)-C(3)   | 1.523(5) |
| C(3)-C(11)  | 1.538(5) |
| C(3)-C(7)   | 1.557(4) |
| C(4)-C(6)   | 1.491(5) |
| C(4)-C(5)   | 1.524(5) |
| C(5)-H(5A)  | 0.9800   |
| C(5)-H(5B)  | 0.9800   |
| C(5)-H(5C)  | 0.9800   |
| C(6)-H(6A)  | 0.9800   |
| C(6)-H(6B)  | 0.9800   |
| C(6)-H(6C)  | 0.9800   |
| C(7)-C(8)   | 1.555(4) |
| C(7)-H(7)   | 1.0000   |
| C(8)-C(9)   | 1.501(5) |
| C(9)-C(10)  | 1.320(5) |
| C(9)-H(9)   | 0.9500   |
| C(10)-C(11) | 1.490(5) |
| C(10)-H(10) | 0.9500   |
| C(11)-H(11) | 1.0000   |
| C(14)-C(15) | 1.378(5) |
| C(14)-C(19) | 1.390(4) |
| C(15)-C(16) | 1.385(5) |
| C(15)-H(15) | 0.9500   |
| C(16)-C(17) | 1.390(5) |
| C(16)-H(16) | 0.9500   |
| C(17)-C(18) | 1.368(5) |
| C(17)-H(17) | 0.9500   |
| C(18)-C(19) | 1.391(4) |
| C(18)-H(18) | 0.9500   |
| C(19)-H(19) | 0.9500   |

---

Table S4. Bond angles [deg] for 13.

---

|                   |            |
|-------------------|------------|
| C(12)-N(1)-N(2)   | 108.9(2)   |
| C(12)-N(1)-C(11)  | 120.4(3)   |
| N(2)-N(1)-C(11)   | 113.0(2)   |
| C(13)-N(2)-N(1)   | 107.1(2)   |
| C(13)-N(2)-C(8)   | 125.5(2)   |
| N(1)-N(2)-C(8)    | 109.1(2)   |
| C(13)-N(3)-C(12)  | 111.9(2)   |
| C(13)-N(3)-C(14)  | 124.6(2)   |
| C(12)-N(3)-C(14)  | 123.5(3)   |
| C(2)-O(1)-C(1)    | 116.4(4)   |
| C(3)-O(3)-C(4)    | 109.7(2)   |
| C(7)-O(4)-C(4)    | 110.1(2)   |
| O(1)-C(1)-H(1A)   | 109.5      |
| O(1)-C(1)-H(1B)   | 109.5      |
| H(1A)-C(1)-H(1B)  | 109.5      |
| O(1)-C(1)-H(1C)   | 109.5      |
| H(1A)-C(1)-H(1C)  | 109.5      |
| H(1B)-C(1)-H(1C)  | 109.5      |
| O(2)-C(2)-O(1)    | 123.8(3)   |
| O(2)-C(2)-C(3)    | 124.5(4)   |
| O(1)-C(2)-C(3)    | 111.7(3)   |
| O(3)-C(3)-C(2)    | 108.0(2)   |
| O(3)-C(3)-C(11)   | 109.7(3)   |
| C(2)-C(3)-C(11)   | 109.6(3)   |
| O(3)-C(3)-C(7)    | 104.8(2)   |
| C(2)-C(3)-C(7)    | 116.8(3)   |
| C(11)-C(3)-C(7)   | 107.7(2)   |
| O(4)-C(4)-O(3)    | 105.6(2)   |
| O(4)-C(4)-C(6)    | 109.5(3)   |
| O(3)-C(4)-C(6)    | 108.0(3)   |
| O(4)-C(4)-C(5)    | 109.4(3)   |
| O(3)-C(4)-C(5)    | 110.4(3)   |
| C(6)-C(4)-C(5)    | 113.6(3)   |
| C(4)-C(5)-H(5A)   | 109.5      |
| C(4)-C(5)-H(5B)   | 109.5      |
| H(5A)-C(5)-H(5B)  | 109.5      |
| C(4)-C(5)-H(5C)   | 109.5      |
| H(5A)-C(5)-H(5C)  | 109.5      |
| H(5B)-C(5)-H(5C)  | 109.5      |
| C(4)-C(6)-H(6A)   | 109.5      |
| C(4)-C(6)-H(6B)   | 109.5      |
| H(6A)-C(6)-H(6B)  | 109.5      |
| C(4)-C(6)-H(6C)   | 109.5      |
| H(6A)-C(6)-H(6C)  | 109.5      |
| H(6B)-C(6)-H(6C)  | 109.5      |
| O(4)-C(7)-C(8)    | 109.5(2)   |
| O(4)-C(7)-C(3)    | 105.4(2)   |
| C(8)-C(7)-C(3)    | 108.2(2)   |
| O(4)-C(7)-H(7)    | 111.2      |
| C(8)-C(7)-H(7)    | 111.2      |
| C(3)-C(7)-H(7)    | 111.2      |
| N(2)-C(8)-C(9)    | 110.6(3)   |
| N(2)-C(8)-C(7)    | 104.2(2)   |
| C(9)-C(8)-C(7)    | 110.3(2)   |
| N(2)-C(8)-Br      | 110.71(19) |
| C(9)-C(8)-Br      | 113.0(2)   |
| C(7)-C(8)-Br      | 107.7(2)   |
| C(10)-C(9)-C(8)   | 112.5(3)   |
| C(10)-C(9)-H(9)   | 123.8      |
| C(8)-C(9)-H(9)    | 123.8      |
| C(9)-C(10)-C(11)  | 114.4(3)   |
| C(9)-C(10)-H(10)  | 122.8      |
| C(11)-C(10)-H(10) | 122.8      |
| N(1)-C(11)-C(10)  | 109.4(2)   |

|                   |          |
|-------------------|----------|
| N(1)-C(11)-C(3)   | 101.9(3) |
| C(10)-C(11)-C(3)  | 111.3(3) |
| N(1)-C(11)-H(11)  | 111.3    |
| C(10)-C(11)-H(11) | 111.3    |
| C(3)-C(11)-H(11)  | 111.3    |
| O(5)-C(12)-N(1)   | 126.2(3) |
| O(5)-C(12)-N(3)   | 128.6(3) |
| N(1)-C(12)-N(3)   | 105.2(3) |
| O(6)-C(13)-N(3)   | 126.1(3) |
| O(6)-C(13)-N(2)   | 128.0(3) |
| N(3)-C(13)-N(2)   | 105.8(2) |
| C(15)-C(14)-C(19) | 121.7(3) |
| C(15)-C(14)-N(3)  | 119.6(3) |
| C(19)-C(14)-N(3)  | 118.6(3) |
| C(14)-C(15)-C(16) | 118.7(3) |
| C(14)-C(15)-H(15) | 120.6    |
| C(16)-C(15)-H(15) | 120.6    |
| C(15)-C(16)-C(17) | 120.2(3) |
| C(15)-C(16)-H(16) | 119.9    |
| C(17)-C(16)-H(16) | 119.9    |
| C(18)-C(17)-C(16) | 120.6(3) |
| C(18)-C(17)-H(17) | 119.7    |
| C(16)-C(17)-H(17) | 119.7    |
| C(17)-C(18)-C(19) | 120.2(3) |
| C(17)-C(18)-H(18) | 119.9    |
| C(19)-C(18)-H(18) | 119.9    |
| C(14)-C(19)-C(18) | 118.6(3) |
| C(14)-C(19)-H(19) | 120.7    |
| C(18)-C(19)-H(19) | 120.7    |

---

Table S5. Anisotropic displacement parameters ( $\text{\AA}^2 \times 10^3$ ) for **13**.  
 The anisotropic displacement factor exponent takes the form:  
 $-2 \pi^2 [ h^2 a^{*2} U_{11} + \dots + 2 h k a^* b^* U_{12} ]$

|       | U11    | U22    | U33    | U23     | U13     | U12    |
|-------|--------|--------|--------|---------|---------|--------|
| Br    | 49 (1) | 43 (1) | 40 (1) | -13 (1) | -11 (1) | 25 (1) |
| N(1)  | 34 (1) | 40 (1) | 29 (1) | -8 (1)  | -8 (1)  | 25 (1) |
| N(2)  | 32 (1) | 37 (1) | 29 (1) | -6 (1)  | -7 (1)  | 22 (1) |
| N(3)  | 35 (1) | 43 (1) | 28 (1) | -7 (1)  | -6 (1)  | 26 (1) |
| O(1)  | 53 (1) | 39 (1) | 56 (2) | 7 (1)   | 10 (1)  | 18 (1) |
| O(2)  | 63 (2) | 44 (1) | 61 (2) | -12 (1) | -15 (2) | 22 (1) |
| O(3)  | 33 (1) | 51 (1) | 41 (1) | -9 (1)  | -8 (1)  | 28 (1) |
| O(4)  | 38 (1) | 49 (1) | 45 (2) | -9 (1)  | -14 (1) | 27 (1) |
| O(5)  | 54 (1) | 65 (2) | 41 (2) | -22 (1) | -22 (1) | 42 (1) |
| O(6)  | 48 (1) | 44 (1) | 37 (1) | -5 (1)  | -4 (1)  | 31 (1) |
| C(1)  | 74 (3) | 45 (2) | 96 (4) | 21 (2)  | 30 (3)  | 15 (2) |
| C(2)  | 39 (2) | 40 (2) | 50 (2) | -5 (2)  | -4 (2)  | 25 (2) |
| C(3)  | 34 (2) | 43 (2) | 33 (2) | -3 (1)  | -2 (1)  | 25 (1) |
| C(4)  | 38 (2) | 49 (2) | 36 (2) | -5 (2)  | -10 (1) | 26 (2) |
| C(5)  | 56 (2) | 59 (2) | 50 (2) | 3 (2)   | -10 (2) | 36 (2) |
| C(6)  | 38 (2) | 69 (2) | 66 (3) | -7 (2)  | -4 (2)  | 28 (2) |
| C(7)  | 29 (1) | 40 (2) | 25 (2) | 0 (1)   | -4 (1)  | 21 (1) |
| C(8)  | 33 (1) | 34 (2) | 30 (2) | 2 (1)   | -1 (1)  | 18 (1) |
| C(9)  | 36 (2) | 43 (2) | 41 (2) | 4 (2)   | -1 (2)  | 19 (2) |
| C(10) | 41 (2) | 60 (2) | 26 (2) | -3 (2)  | -2 (1)  | 31 (2) |
| C(11) | 37 (2) | 47 (2) | 29 (2) | -3 (1)  | -3 (1)  | 28 (1) |
| C(12) | 37 (2) | 44 (2) | 33 (2) | -8 (1)  | -11 (1) | 25 (1) |
| C(13) | 35 (1) | 39 (2) | 26 (2) | 0 (1)   | 3 (1)   | 22 (1) |
| C(14) | 29 (1) | 39 (2) | 31 (2) | -2 (1)  | -4 (1)  | 22 (1) |
| C(15) | 35 (2) | 40 (2) | 37 (2) | 7 (2)   | 6 (2)   | 22 (1) |
| C(16) | 41 (2) | 43 (2) | 31 (2) | 9 (1)   | 4 (1)   | 23 (1) |
| C(17) | 37 (2) | 44 (2) | 39 (2) | 8 (2)   | -4 (2)  | 24 (1) |
| C(18) | 33 (2) | 41 (2) | 35 (2) | 7 (1)   | 5 (1)   | 22 (1) |
| C(19) | 40 (2) | 44 (2) | 27 (2) | 2 (1)   | -1 (1)  | 26 (1) |

Table S6. Hydrogen coordinates ( $\times 10^4$ ) and isotropic displacement parameters ( $\text{\AA}^2 \times 10^3$ ) for **13**.

|       | x    | y    | z     | U(eq) |
|-------|------|------|-------|-------|
| H(1A) | 3660 | 6471 | 1488  | 117   |
| H(1B) | 3780 | 6233 | -580  | 117   |
| H(1C) | 4129 | 6299 | 1469  | 117   |
| H(5A) | 2376 | 5267 | 312   | 77    |
| H(5B) | 1829 | 5258 | 1144  | 77    |
| H(5C) | 1778 | 4806 | -507  | 77    |
| H(6A) | 1372 | 4061 | 4391  | 86    |
| H(6B) | 1127 | 4054 | 2145  | 86    |
| H(6C) | 1228 | 4532 | 3757  | 86    |
| H(7)  | 2970 | 4680 | 1204  | 36    |
| H(9)  | 2121 | 3438 | 5419  | 49    |
| H(10) | 2264 | 4121 | 7898  | 48    |
| H(11) | 2983 | 5043 | 7245  | 41    |
| H(15) | 3923 | 3986 | 10293 | 43    |
| H(16) | 4631 | 3919 | 11988 | 45    |
| H(17) | 5474 | 4198 | 10313 | 46    |
| H(18) | 5625 | 4562 | 7009  | 42    |
| H(19) | 4930 | 4658 | 5316  | 41    |

Table S7. Crystal data and structure refinement for **21**.

|                                   |                                                                                                                 |
|-----------------------------------|-----------------------------------------------------------------------------------------------------------------|
| Identification code               | h10sel3                                                                                                         |
| Empirical formula                 | C14 H13 Br Fe O7                                                                                                |
| Formula weight                    | 429.00                                                                                                          |
| Temperature                       | 150(2) K                                                                                                        |
| Wavelength                        | 0.71073 Å                                                                                                       |
| Crystal system, space group       | Orthorhombic, $P 2_1 2_1 2_1$                                                                                   |
| Unit cell dimensions              | a = 8.6252(3) Å    alpha = 90 deg.<br>b = 8.6773(3) Å    beta = 90 deg.<br>c = 43.7286(16) Å    gamma = 90 deg. |
| Volume                            | 3272.8(2) Å <sup>3</sup>                                                                                        |
| Z, Calculated density             | 8, 1.741 Mg/m <sup>3</sup>                                                                                      |
| Absorption coefficient            | 3.394 mm <sup>-1</sup>                                                                                          |
| F(000)                            | 1712                                                                                                            |
| Crystal size                      | 0.45 x 0.30 x 0.15 mm                                                                                           |
| Theta range for data collection   | 3.31 to 27.56 deg.                                                                                              |
| Limiting indices                  | -11<=h<=11, -10<=k<=11, -56<=l<=56                                                                              |
| Reflections collected / unique    | 25844 / 6937 [R(int) = 0.0663]                                                                                  |
| Completeness to theta = 27.56     | 95.8 %                                                                                                          |
| Absorption correction             | Semi-empirical from equivalents                                                                                 |
| Max. and min. transmission        | 0.6300 and 0.3104                                                                                               |
| Refinement method                 | Full-matrix least-squares on F <sup>2</sup>                                                                     |
| Data / restraints / parameters    | 6937 / 0 / 429                                                                                                  |
| Goodness-of-fit on F <sup>2</sup> | 1.063                                                                                                           |
| Final R indices [I>2sigma(I)]     | R1 = 0.0437, wR2 = 0.0788                                                                                       |
| R indices (all data)              | R1 = 0.0677, wR2 = 0.0860                                                                                       |
| Absolute structure parameter      | 0.011(9)                                                                                                        |
| Largest diff. peak and hole       | 0.554 and -0.567 e.Å <sup>-3</sup>                                                                              |

Table S8. Atomic coordinates ( $\times 10^4$ ) and equivalent isotropic displacement parameters ( $\text{\AA}^2 \times 10^3$ ) for **21**.  
U(eq) is defined as one third of the trace of the orthogonalized Uij tensor.

|       | x        | y        | z       | U(eq) |
|-------|----------|----------|---------|-------|
| Fe(1) | 10630(1) | 3004(1)  | 1789(1) | 29(1) |
| C(10) | 11952(6) | 4506(7)  | 1691(1) | 37(1) |
| O(10) | 12725(4) | 5543(5)  | 1637(1) | 55(1) |
| C(20) | 9414(5)  | 3129(5)  | 1460(1) | 33(1) |
| O(20) | 8621(4)  | 3203(5)  | 1252(1) | 48(1) |
| C(30) | 11935(7) | 1555(7)  | 1656(1) | 49(1) |
| O(30) | 12798(6) | 659(6)   | 1564(1) | 82(2) |
| Br(1) | 9092(1)  | -631(1)  | 1945(1) | 40(1) |
| O(1)  | 5849(4)  | 4037(4)  | 1661(1) | 45(1) |
| O(2)  | 7164(4)  | 6167(4)  | 1767(1) | 34(1) |
| O(3)  | 6991(3)  | 4460(4)  | 2354(1) | 26(1) |
| O(4)  | 7042(3)  | 1862(4)  | 2372(1) | 32(1) |
| C(1)  | 7613(5)  | 2229(5)  | 2075(1) | 25(1) |
| C(2)  | 9181(5)  | 1552(5)  | 2031(1) | 28(1) |
| C(3)  | 10416(5) | 2056(5)  | 2218(1) | 27(1) |
| C(4)  | 10515(5) | 3662(5)  | 2237(1) | 27(1) |
| C(5)  | 9388(5)  | 4487(6)  | 2071(1) | 26(1) |
| C(6)  | 7726(5)  | 4003(5)  | 2075(1) | 24(1) |
| C(7)  | 6801(5)  | 4696(5)  | 1809(1) | 27(1) |
| C(8)  | 6394(5)  | 6928(6)  | 1514(1) | 39(1) |
| C(9)  | 6190(5)  | 3148(5)  | 2481(1) | 29(1) |
| C(11) | 6334(6)  | 3219(7)  | 2823(1) | 43(1) |
| C(12) | 4525(5)  | 3111(6)  | 2376(1) | 40(1) |
| Fe(2) | 10537(1) | 8236(1)  | 709(1)  | 31(1) |
| C(40) | 12113(8) | 9453(7)  | 814(1)  | 49(1) |
| C(50) | 10325(5) | 7159(6)  | 1058(1) | 34(1) |
| C(60) | 9096(8)  | 9641(7)  | 804(1)  | 52(2) |
| O(40) | 13210(6) | 10130(5) | 881(1)  | 80(2) |
| O(50) | 10073(5) | 6542(4)  | 1279(1) | 54(1) |
| O(60) | 8167(6)  | 10514(6) | 869(1)  | 86(2) |
| Br(2) | 6891(1)  | 6719(1)  | 544(1)  | 39(1) |
| O(5)  | 11603(4) | 3692(5)  | 904(1)  | 59(1) |
| O(6)  | 13814(4) | 4496(4)  | 706(1)  | 36(1) |
| O(7)  | 11983(3) | 4543(4)  | 163(1)  | 27(1) |
| O(8)  | 9357(4)  | 4498(4)  | 165(1)  | 34(1) |
| C(21) | 9769(5)  | 5174(5)  | 451(1)  | 27(1) |
| C(22) | 9099(5)  | 6770(5)  | 470(1)  | 29(1) |
| C(23) | 9665(5)  | 7941(5)  | 278(1)  | 29(1) |
| C(24) | 11290(6) | 8018(5)  | 265(1)  | 32(1) |
| C(25) | 12078(6) | 6912(6)  | 448(1)  | 29(1) |
| C(26) | 11539(5) | 5273(5)  | 446(1)  | 24(1) |
| C(27) | 12292(5) | 4390(5)  | 715(1)  | 25(1) |
| C(28) | 14656(6) | 3757(6)  | 952(1)  | 37(1) |
| C(29) | 10673(5) | 3691(5)  | 53(1)   | 29(1) |
| C(31) | 10679(7) | 3765(6)  | -290(1) | 47(1) |
| C(32) | 10713(6) | 2062(5)  | 174(1)  | 44(1) |

Table S9. Bond lengths [Å] for **21**.

---

|                |           |
|----------------|-----------|
| Fe (1) -C (30) | 1.785 (6) |
| Fe (1) -C (10) | 1.785 (6) |
| Fe (1) -C (20) | 1.785 (5) |
| Fe (1) -C (4)  | 2.044 (4) |
| Fe (1) -C (3)  | 2.054 (4) |
| Fe (1) -C (2)  | 2.066 (5) |
| Fe (1) -C (5)  | 2.079 (5) |
| C (10) -O (10) | 1.143 (6) |
| C (20) -O (20) | 1.141 (5) |
| C (30) -O (30) | 1.149 (6) |
| Br (1) -C (2)  | 1.933 (4) |
| O (1) -C (7)   | 1.193 (5) |
| O (2) -C (7)   | 1.326 (5) |
| O (2) -C (8)   | 1.451 (5) |
| O (3) -C (6)   | 1.432 (5) |
| O (3) -C (9)   | 1.444 (5) |
| O (4) -C (9)   | 1.420 (5) |
| O (4) -C (1)   | 1.423 (5) |
| C (1) -C (2)   | 1.487 (6) |
| C (1) -C (6)   | 1.543 (6) |
| C (2) -C (3)   | 1.410 (6) |
| C (3) -C (4)   | 1.399 (6) |
| C (4) -C (5)   | 1.410 (6) |
| C (5) -C (6)   | 1.494 (6) |
| C (5) -H (5)   | 0.85 (4)  |
| C (6) -C (7)   | 1.532 (6) |
| C (9) -C (11)  | 1.500 (6) |
| C (9) -C (12)  | 1.509 (6) |
| Fe (2) -C (40) | 1.782 (7) |
| Fe (2) -C (60) | 1.790 (6) |
| Fe (2) -C (50) | 1.799 (5) |
| Fe (2) -C (23) | 2.042 (4) |
| Fe (2) -C (24) | 2.057 (5) |
| Fe (2) -C (22) | 2.061 (4) |
| Fe (2) -C (25) | 2.096 (5) |
| C (40) -O (40) | 1.151 (7) |
| C (50) -O (50) | 1.125 (5) |
| C (60) -O (60) | 1.139 (7) |
| Br (2) -C (22) | 1.933 (4) |
| O (5) -C (27)  | 1.184 (5) |
| O (6) -C (27)  | 1.317 (5) |
| O (6) -C (28)  | 1.447 (5) |
| O (7) -C (29)  | 1.433 (5) |
| O (7) -C (26)  | 1.441 (5) |
| O (8) -C (29)  | 1.421 (5) |
| O (8) -C (21)  | 1.426 (5) |
| C (21) -C (22) | 1.503 (6) |
| C (21) -C (26) | 1.528 (6) |
| C (22) -C (23) | 1.404 (6) |
| C (23) -C (24) | 1.405 (7) |
| C (24) -C (25) | 1.422 (7) |
| C (25) -C (26) | 1.496 (7) |
| C (25) -H (25) | 0.93 (4)  |
| C (26) -C (27) | 1.547 (6) |
| C (29) -C (31) | 1.500 (6) |
| C (29) -C (32) | 1.509 (6) |

---



Table S10. Bond lengths [Å] and angles [deg] for **21**.

---

|                   |            |
|-------------------|------------|
| C(30)-Fe(1)-C(10) | 91.9(2)    |
| C(30)-Fe(1)-C(20) | 98.7(2)    |
| C(10)-Fe(1)-C(20) | 97.8(2)    |
| C(30)-Fe(1)-C(4)  | 122.7(2)   |
| C(10)-Fe(1)-C(4)  | 93.3(2)    |
| C(20)-Fe(1)-C(4)  | 136.7(2)   |
| C(30)-Fe(1)-C(3)  | 94.1(2)    |
| C(10)-Fe(1)-C(3)  | 124.7(2)   |
| C(20)-Fe(1)-C(3)  | 135.03(19) |
| C(4)-Fe(1)-C(3)   | 39.93(17)  |
| C(30)-Fe(1)-C(2)  | 96.8(2)    |
| C(10)-Fe(1)-C(2)  | 162.8(2)   |
| C(20)-Fe(1)-C(2)  | 95.5(2)    |
| C(4)-Fe(1)-C(2)   | 69.49(17)  |
| C(3)-Fe(1)-C(2)   | 40.01(17)  |
| C(30)-Fe(1)-C(5)  | 162.6(2)   |
| C(10)-Fe(1)-C(5)  | 91.1(2)    |
| C(20)-Fe(1)-C(5)  | 97.92(19)  |
| C(4)-Fe(1)-C(5)   | 39.97(17)  |
| C(3)-Fe(1)-C(5)   | 70.20(18)  |
| C(2)-Fe(1)-C(5)   | 76.24(18)  |
| O(10)-C(10)-Fe(1) | 175.0(5)   |
| O(20)-C(20)-Fe(1) | 179.1(4)   |
| O(30)-C(30)-Fe(1) | 177.6(5)   |
| C(7)-O(2)-C(8)    | 115.8(4)   |
| C(6)-O(3)-C(9)    | 108.9(3)   |
| C(9)-O(4)-C(1)    | 108.1(3)   |
| O(4)-C(1)-C(2)    | 110.1(3)   |
| O(4)-C(1)-C(6)    | 104.3(4)   |
| C(2)-C(1)-C(6)    | 109.7(4)   |
| C(3)-C(2)-C(1)    | 119.4(4)   |
| C(3)-C(2)-Br(1)   | 116.6(3)   |
| C(1)-C(2)-Br(1)   | 112.1(3)   |
| C(3)-C(2)-Fe(1)   | 69.5(3)    |
| C(1)-C(2)-Fe(1)   | 112.0(3)   |
| Br(1)-C(2)-Fe(1)  | 121.4(2)   |
| C(4)-C(3)-C(2)    | 113.0(4)   |
| C(4)-C(3)-Fe(1)   | 69.6(3)    |
| C(2)-C(3)-Fe(1)   | 70.4(3)    |
| C(3)-C(4)-C(5)    | 115.6(4)   |
| C(3)-C(4)-Fe(1)   | 70.4(3)    |
| C(5)-C(4)-Fe(1)   | 71.4(3)    |
| C(4)-C(5)-C(6)    | 120.9(4)   |
| C(4)-C(5)-Fe(1)   | 68.7(3)    |
| C(6)-C(5)-Fe(1)   | 109.1(3)   |
| O(3)-C(6)-C(5)    | 110.9(3)   |
| O(3)-C(6)-C(7)    | 107.9(3)   |
| C(5)-C(6)-C(7)    | 112.4(4)   |
| O(3)-C(6)-C(1)    | 104.3(4)   |
| C(5)-C(6)-C(1)    | 109.9(4)   |
| C(7)-C(6)-C(1)    | 111.1(4)   |
| O(1)-C(7)-O(2)    | 123.3(4)   |
| O(1)-C(7)-C(6)    | 125.6(4)   |
| O(2)-C(7)-C(6)    | 111.1(4)   |
| O(4)-C(9)-O(3)    | 104.0(3)   |
| O(4)-C(9)-C(11)   | 109.0(4)   |
| O(3)-C(9)-C(11)   | 108.3(4)   |
| O(4)-C(9)-C(12)   | 111.9(4)   |
| O(3)-C(9)-C(12)   | 110.7(4)   |
| C(11)-C(9)-C(12)  | 112.6(4)   |
| C(40)-Fe(2)-C(60) | 93.8(3)    |
| C(40)-Fe(2)-C(50) | 99.6(2)    |
| C(60)-Fe(2)-C(50) | 95.0(2)    |
| C(40)-Fe(2)-C(23) | 126.4(2)   |
| C(60)-Fe(2)-C(23) | 92.5(2)    |

|                   |           |
|-------------------|-----------|
| C(50)-Fe(2)-C(23) | 132.8(2)  |
| C(40)-Fe(2)-C(24) | 93.3(2)   |
| C(60)-Fe(2)-C(24) | 120.1(2)  |
| C(50)-Fe(2)-C(24) | 141.8(2)  |
| C(23)-Fe(2)-C(24) | 40.08(18) |
| C(40)-Fe(2)-C(22) | 162.9(2)  |
| C(60)-Fe(2)-C(22) | 96.9(2)   |
| C(50)-Fe(2)-C(22) | 92.8(2)   |
| C(23)-Fe(2)-C(22) | 40.00(18) |
| C(24)-Fe(2)-C(22) | 69.78(18) |
| C(40)-Fe(2)-C(25) | 88.9(2)   |
| C(60)-Fe(2)-C(25) | 160.1(2)  |
| C(50)-Fe(2)-C(25) | 104.0(2)  |
| C(23)-Fe(2)-C(25) | 70.30(18) |
| C(24)-Fe(2)-C(25) | 40.04(18) |
| C(22)-Fe(2)-C(25) | 76.53(17) |
| O(40)-C(40)-Fe(2) | 174.2(6)  |
| O(50)-C(50)-Fe(2) | 174.2(4)  |
| O(60)-C(60)-Fe(2) | 178.4(6)  |
| C(27)-O(6)-C(28)  | 116.6(4)  |
| C(29)-O(7)-C(26)  | 107.8(3)  |
| C(29)-O(8)-C(21)  | 107.8(3)  |
| O(8)-C(21)-C(22)  | 109.3(4)  |
| O(8)-C(21)-C(26)  | 105.1(4)  |
| C(22)-C(21)-C(26) | 109.5(4)  |
| C(23)-C(22)-C(21) | 120.1(4)  |
| C(23)-C(22)-Br(2) | 117.4(3)  |
| C(21)-C(22)-Br(2) | 111.5(3)  |
| C(23)-C(22)-Fe(2) | 69.3(3)   |
| C(21)-C(22)-Fe(2) | 111.4(3)  |
| Br(2)-C(22)-Fe(2) | 121.4(2)  |
| C(22)-C(23)-C(24) | 114.0(4)  |
| C(22)-C(23)-Fe(2) | 70.7(3)   |
| C(24)-C(23)-Fe(2) | 70.5(3)   |
| C(23)-C(24)-C(25) | 114.9(4)  |
| C(23)-C(24)-Fe(2) | 69.4(3)   |
| C(25)-C(24)-Fe(2) | 71.5(3)   |
| C(24)-C(25)-C(26) | 119.3(4)  |
| C(24)-C(25)-Fe(2) | 68.5(3)   |
| C(26)-C(25)-Fe(2) | 109.0(3)  |
| O(7)-C(26)-C(25)  | 109.8(3)  |
| O(7)-C(26)-C(21)  | 104.7(4)  |
| C(25)-C(26)-C(21) | 111.4(4)  |
| O(7)-C(26)-C(27)  | 108.9(3)  |
| C(25)-C(26)-C(27) | 109.6(4)  |
| C(21)-C(26)-C(27) | 112.3(4)  |
| O(5)-C(27)-O(6)   | 123.8(4)  |
| O(5)-C(27)-C(26)  | 125.0(4)  |
| O(6)-C(27)-C(26)  | 111.2(4)  |
| O(8)-C(29)-O(7)   | 105.1(3)  |
| O(8)-C(29)-C(31)  | 109.0(4)  |
| O(7)-C(29)-C(31)  | 108.1(4)  |
| O(8)-C(29)-C(32)  | 111.0(4)  |
| O(7)-C(29)-C(32)  | 110.4(4)  |
| C(31)-C(29)-C(32) | 112.9(4)  |

---

Table S11. Anisotropic displacement parameters ( $\text{\AA}^2 \times 10^3$ ) for **21**.  
 The anisotropic displacement factor exponent takes the form:  
 $-2 \pi^2 [ h^2 a^{*2} U_{11} + \dots + 2 h k a^* b^* U_{12} ]$

|        | U11     | U22    | U33    | U23     | U13     | U12     |
|--------|---------|--------|--------|---------|---------|---------|
| Fe (1) | 30 (1)  | 36 (1) | 20 (1) | -1 (1)  | 1 (1)   | 3 (1)   |
| C (10) | 29 (3)  | 52 (3) | 32 (3) | -6 (3)  | -4 (2)  | 2 (3)   |
| O (10) | 37 (2)  | 68 (3) | 59 (3) | 3 (2)   | 3 (2)   | -20 (2) |
| C (20) | 37 (3)  | 30 (3) | 32 (3) | -5 (2)  | 11 (2)  | -6 (3)  |
| O (20) | 48 (2)  | 76 (3) | 19 (2) | 0 (2)   | -8 (2)  | -13 (2) |
| C (30) | 58 (3)  | 61 (4) | 27 (3) | 6 (3)   | 15 (3)  | 19 (3)  |
| O (30) | 109 (4) | 78 (3) | 58 (3) | 13 (3)  | 42 (3)  | 52 (3)  |
| Br (1) | 59 (1)  | 28 (1) | 34 (1) | -3 (1)  | -5 (1)  | 7 (1)   |
| O (1)  | 46 (2)  | 37 (2) | 53 (2) | 3 (2)   | -30 (2) | -7 (2)  |
| O (2)  | 37 (2)  | 30 (2) | 33 (2) | 9 (1)   | -10 (2) | -9 (2)  |
| O (3)  | 24 (2)  | 28 (2) | 25 (2) | 0 (1)   | 3 (1)   | -1 (2)  |
| O (4)  | 31 (2)  | 28 (2) | 35 (2) | 6 (2)   | 7 (2)   | 2 (2)   |
| C (1)  | 24 (2)  | 26 (3) | 23 (2) | 2 (2)   | -2 (2)  | -2 (2)  |
| C (2)  | 40 (3)  | 26 (2) | 18 (2) | -1 (2)  | -2 (2)  | 0 (2)   |
| C (3)  | 30 (2)  | 37 (3) | 15 (2) | 2 (2)   | 3 (2)   | 7 (2)   |
| C (4)  | 26 (2)  | 38 (3) | 18 (2) | -5 (2)  | -3 (2)  | -2 (2)  |
| C (5)  | 24 (2)  | 29 (3) | 24 (2) | -4 (2)  | 1 (2)   | -8 (2)  |
| C (6)  | 22 (2)  | 31 (3) | 19 (2) | 1 (2)   | -3 (2)  | 1 (2)   |
| C (7)  | 28 (2)  | 29 (3) | 24 (2) | 0 (2)   | -1 (2)  | -1 (2)  |
| C (8)  | 42 (3)  | 34 (3) | 40 (3) | 13 (2)  | -11 (2) | -6 (2)  |
| C (9)  | 26 (2)  | 28 (3) | 33 (2) | 1 (2)   | 5 (2)   | -1 (2)  |
| C (11) | 39 (3)  | 56 (3) | 34 (3) | 6 (3)   | 9 (2)   | 2 (3)   |
| C (12) | 28 (3)  | 40 (3) | 53 (3) | 4 (3)   | 2 (2)   | -6 (3)  |
| Fe (2) | 48 (1)  | 24 (1) | 21 (1) | 0 (1)   | -1 (1)  | 1 (1)   |
| C (40) | 82 (4)  | 32 (3) | 32 (3) | 2 (3)   | 8 (3)   | -9 (4)  |
| C (50) | 40 (3)  | 35 (3) | 27 (3) | 1 (2)   | 1 (2)   | 3 (2)   |
| C (60) | 79 (4)  | 46 (4) | 33 (3) | -8 (3)  | -19 (3) | 11 (4)  |
| O (40) | 101 (4) | 79 (4) | 58 (3) | -20 (2) | 6 (3)   | -54 (3) |
| O (50) | 72 (3)  | 53 (3) | 36 (2) | 16 (2)  | 7 (2)   | -2 (2)  |
| O (60) | 108 (4) | 73 (3) | 76 (4) | -33 (3) | -25 (3) | 54 (3)  |
| Br (2) | 34 (1)  | 50 (1) | 33 (1) | 4 (1)   | 2 (1)   | 11 (1)  |
| O (5)  | 34 (2)  | 84 (3) | 59 (3) | 46 (2)  | 7 (2)   | 4 (2)   |
| O (6)  | 34 (2)  | 39 (2) | 33 (2) | 9 (2)   | -10 (2) | -1 (2)  |
| O (7)  | 29 (2)  | 30 (2) | 22 (2) | -1 (1)  | 3 (1)   | -3 (2)  |
| O (8)  | 33 (2)  | 29 (2) | 39 (2) | -10 (2) | -7 (2)  | 0 (2)   |
| C (21) | 33 (3)  | 20 (2) | 29 (3) | 1 (2)   | 2 (2)   | 2 (2)   |
| C (22) | 32 (2)  | 32 (2) | 22 (2) | -2 (2)  | -1 (2)  | 3 (2)   |
| C (23) | 37 (3)  | 30 (3) | 21 (2) | -1 (2)  | -1 (2)  | 9 (2)   |
| C (24) | 52 (3)  | 20 (2) | 23 (2) | 2 (2)   | 5 (2)   | -4 (2)  |
| C (25) | 28 (2)  | 25 (3) | 32 (2) | 2 (2)   | 3 (2)   | -3 (2)  |
| C (26) | 27 (3)  | 23 (3) | 23 (2) | 0 (2)   | 3 (2)   | 0 (2)   |
| C (27) | 28 (3)  | 26 (2) | 22 (2) | 1 (2)   | -2 (2)  | 2 (2)   |
| C (28) | 39 (3)  | 37 (3) | 34 (3) | 2 (2)   | -19 (2) | 0 (2)   |
| C (29) | 30 (2)  | 26 (2) | 30 (3) | -3 (2)  | -2 (2)  | -2 (2)  |
| C (31) | 57 (3)  | 51 (3) | 34 (3) | -6 (2)  | -11 (3) | -11 (3) |
| C (32) | 44 (3)  | 21 (2) | 67 (4) | -3 (2)  | 5 (3)   | 0 (2)   |

Table S12. Hydrogen coordinates ( $\times 10^4$ ) and isotropic displacement parameters ( $\text{\AA}^2 \times 10^3$ ) for **21**.

|        | x         | y        | z       | U(eq)  |
|--------|-----------|----------|---------|--------|
| H(1)   | 6883      | 1862     | 1913    | 30     |
| H(3)   | 11108     | 1375     | 2319    | 33     |
| H(4)   | 11291     | 4164     | 2355    | 33     |
| H(8A)  | 6639      | 6388     | 1323    | 58     |
| H(8B)  | 6753      | 7998     | 1500    | 58     |
| H(8C)  | 5271      | 6914     | 1547    | 58     |
| H(11A) | 5835      | 2313     | 2913    | 65     |
| H(11B) | 5829      | 4155     | 2899    | 65     |
| H(11C) | 7433      | 3234     | 2880    | 65     |
| H(12A) | 4493      | 2989     | 2153    | 61     |
| H(12B) | 4012      | 4078     | 2433    | 61     |
| H(12C) | 3988      | 2244     | 2473    | 61     |
| H(21)  | 9404      | 4523     | 625     | 33     |
| H(23)  | 9008      | 8622     | 168     | 35     |
| H(24)  | 11823     | 8752     | 142     | 38     |
| H(28A) | 14395     | 4257     | 1147    | 55     |
| H(28B) | 15772     | 3849     | 915     | 55     |
| H(28C) | 14370     | 2665     | 962     | 55     |
| H(31A) | 9735      | 3281     | -369    | 71     |
| H(31B) | 11589     | 3218     | -369    | 71     |
| H(31C) | 10717     | 4844     | -355    | 71     |
| H(32A) | 10663     | 2080     | 397     | 66     |
| H(32B) | 11676     | 1561     | 109     | 66     |
| H(32C) | 9824      | 1487     | 93      | 66     |
| H(25)  | 13140(50) | 7050(50) | 436(9)  | 17(10) |
| H(5)   | 9480(40)  | 5460(50) | 2082(9) | 13(11) |
